# Supplementary material for: Photophysical properties of acetylene-linked syn bimane oligomers: a molecular photonic wire
Source: Royal Society of Chemistry journal article supplement (doi:10.1039/c7cp06673b), 2017-12-14
Supplement: c7cp06673b1.pdf [file c7cp06673b1.pdf]

## Supporting Information

### A. Cartesian coordinates of acetylene-linked bimane oligomers optimized with B3LYP/6-31G\*.

#### Dimer

|   |           |           |           |
|---|-----------|-----------|-----------|
| C | -1.722325 | 0.250485  | 0.361951  |
| C | -1.900504 | 1.544543  | -0.055650 |
| C | -0.646630 | 1.987907  | -0.741518 |
| C | 1.504444  | 0.381908  | -1.036431 |
| C | 1.529918  | -1.001713 | -0.531885 |
| C | 0.346309  | -1.277958 | 0.072285  |
| C | -5.127475 | 3.904140  | 0.381034  |
| C | -5.305405 | 5.198365  | -0.036141 |
| C | -6.381413 | 3.460819  | 1.066802  |
| C | -7.371377 | 6.729167  | 0.259590  |
| C | -8.529675 | 5.069264  | 1.368060  |
| C | -8.553468 | 6.454306  | 0.867345  |
| C | -3.031500 | 2.358573  | 0.102610  |
| C | -3.996614 | 3.089962  | 0.222553  |
| H | -0.011515 | -2.175608 | 0.557639  |
| H | -2.395152 | -0.410511 | 0.889548  |
| H | -4.632347 | 5.859488  | -0.563285 |
| H | -7.012940 | 7.627298  | -0.224421 |
| H | -9.398259 | 7.115315  | 0.984539  |
| H | 2.376757  | -1.660922 | -0.644329 |
| O | 2.325569  | 1.041034  | -1.631700 |
| O | -0.357358 | 3.038695  | -1.262420 |
| O | -6.670554 | 2.410236  | 1.588186  |
| O | -9.349998 | 4.410882  | 1.965256  |
| N | -7.223136 | 4.608476  | 0.972382  |
| N | -6.559970 | 5.619628  | 0.316935  |
| N | -0.468141 | -0.171053 | 0.007894  |
| N | 0.194693  | 0.839882  | -0.648192 |

#### Trimer

|   |           |          |           |
|---|-----------|----------|-----------|
| C | -1.715749 | 0.264990 | 0.439227  |
| C | -1.894564 | 1.558083 | 0.014456  |
| C | -0.634309 | 2.007150 | -0.651723 |

|   |           |           |           |
|---|-----------|-----------|-----------|
| C | 1.529772  | 0.428115  | -0.891684 |
| C | 1.572672  | -0.971932 | -0.370428 |
| C | 0.359605  | -1.249229 | 0.209071  |
| C | -5.133920 | 3.909851  | 0.385772  |
| C | -5.306713 | 5.201920  | -0.041486 |
| C | -6.398922 | 3.467817  | 1.051994  |
| C | -7.387750 | 6.722935  | 0.188471  |
| C | -8.563290 | 5.066683  | 1.284574  |
| C | -8.585211 | 6.444275  | 0.762868  |
| C | -3.030414 | 2.367699  | 0.150292  |
| C | -3.999112 | 3.097659  | 0.251234  |
| C | 4.804599  | -3.337810 | -0.715899 |
| C | 4.858515  | -4.739719 | -0.195171 |
| C | 6.014554  | -3.052128 | -1.295553 |
| C | 7.053267  | -6.297604 | -0.418191 |
| C | 8.110307  | -4.555915 | -1.502589 |
| C | 8.290798  | -5.827766 | -1.065047 |
| C | 2.691957  | -1.807528 | -0.484691 |
| C | 3.681928  | -2.505941 | -0.601205 |
| H | 0.007487  | -2.149161 | 0.692589  |
| H | -2.392876 | -0.398047 | 0.958395  |
| H | -4.626015 | 5.861084  | -0.561247 |
| H | -7.023599 | 7.617383  | -0.298063 |
| H | -9.439811 | 7.098012  | 0.844432  |
| H | 6.360566  | -2.148839 | -1.777571 |
| H | 8.778607  | -3.879899 | -2.018074 |
| H | 9.180601  | -6.431294 | -1.156805 |
| O | 2.359681  | 1.088303  | -1.468445 |
| O | -0.337864 | 3.056509  | -1.169628 |
| O | -6.696421 | 2.418576  | 1.570844  |
| O | -9.396374 | 4.407767  | 1.862745  |
| O | 4.031379  | -5.401671 | 0.384704  |
| O | 6.764467  | -7.346880 | 0.109169  |
| N | -7.238314 | 4.615927  | 0.942028  |
| N | -6.565658 | 5.624071  | 0.291484  |
| N | -0.455456 | -0.153624 | 0.105175  |
| N | 0.212033  | 0.860107  | -0.544716 |
| N | 6.174172  | -5.163480 | -0.547927 |
| N | 6.833400  | -4.144738 | -1.195738 |

Tetramer

|   |           |            |           |
|---|-----------|------------|-----------|
| C | -0.117740 | -0.450445  | -0.885394 |
| C | -0.144377 | 0.902905   | -0.658610 |
| C | 1.265938  | 1.380656   | -0.527788 |
| C | 3.386082  | -0.263018  | -0.725865 |
| C | 3.251929  | -1.730219  | -0.976449 |
| C | 1.914785  | -2.026374  | -1.075845 |
| C | -3.325778 | 3.342452   | -0.361538 |
| C | -3.350415 | 4.695244   | -0.135109 |
| C | -4.738737 | 2.867073   | -0.490375 |
| C | -5.393778 | 6.272088   | 0.054566  |
| C | -6.861600 | 4.524649   | -0.290533 |
| C | -6.712868 | 5.969744   | -0.045119 |
| C | -1.260628 | 1.744048   | -0.557062 |
| C | -2.208711 | 2.501528   | -0.463457 |
| C | 6.405077  | -4.204737  | -1.272083 |
| C | 6.271187  | -5.672030  | -1.522282 |
| C | 7.742178  | -3.908268  | -1.173052 |
| C | 8.391674  | -7.315229  | -1.720799 |
| C | 9.775017  | -5.483717  | -1.363998 |
| C | 9.801917  | -6.837082  | -1.590663 |
| C | 10.918391 | -7.677875  | -1.692664 |
| C | 11.866732 | -8.434954  | -1.786891 |
| C | 12.984101 | -9.275387  | -1.889551 |
| C | 13.009199 | -10.628252 | -2.115501 |
| C | 14.396949 | -8.799221  | -1.762411 |
| C | 15.053369 | -12.203287 | -2.311564 |
| C | 16.520633 | -10.454932 | -1.968719 |
| C | 16.372511 | -11.899690 | -2.216439 |
| C | 4.343438  | -2.602266  | -1.081292 |
| C | 5.313436  | -3.332856  | -1.167224 |
| H | 1.421436  | -2.971451  | -1.252281 |
| H | -0.929148 | -1.148885  | -1.031743 |
| H | -2.537616 | 5.392610   | 0.009979  |
| H | -4.891372 | 7.213558   | 0.229437  |
| H | -7.547675 | 6.648597   | 0.036174  |
| H | 8.235362  | -2.963039  | -0.996968 |
| H | 10.586305 | -4.785042  | -1.218109 |
| H | 12.196624 | -11.326054 | -2.259745 |
| H | 14.551329 | -13.144925 | -2.486589 |
| H | 17.207723 | -12.577479 | -2.302321 |
| O | 4.360565  | 0.432437   | -0.572502 |

|   |           |            |           |
|---|-----------|------------|-----------|
| O | 1.717536  | 2.481634   | -0.326035 |
| O | -5.188327 | 1.764421   | -0.691971 |
| O | -7.837153 | 3.826713   | -0.443975 |
| O | 5.296822  | -6.367721  | -1.675322 |
| O | 7.940281  | -8.416342  | -1.922267 |
| O | 14.846189 | -7.696096  | -1.562586 |
| O | 17.496051 | -9.756124  | -1.818381 |
| N | -5.497265 | 4.062218   | -0.314298 |
| N | -4.649579 | 5.125510   | -0.106583 |
| N | 1.182138  | -0.881922  | -0.912105 |
| N | 2.028278  | 0.184023   | -0.702626 |
| N | 7.629083  | -6.118791  | -1.545656 |
| N | 8.475036  | -5.052601  | -1.336673 |
| N | 14.308519 | -11.058052 | -2.144036 |
| N | 15.155850 | -9.994281  | -1.937302 |

#### Pentamer

|   |           |           |           |
|---|-----------|-----------|-----------|
| C | -1.751590 | 0.268800  | 0.410891  |
| C | -1.911180 | 1.569295  | 0.002366  |
| C | -0.658025 | 1.995943  | -0.692305 |
| C | 1.465979  | 0.373850  | -0.993852 |
| C | 1.491792  | -1.029665 | -0.480948 |
| C | 0.284997  | -1.286689 | 0.121828  |
| C | -5.079364 | 3.996056  | 0.486171  |
| C | -5.230482 | 5.297077  | 0.077938  |
| C | -6.335093 | 3.579731  | 1.185539  |
| C | -7.249841 | 6.879578  | 0.414871  |
| C | -8.434877 | 5.242663  | 1.529829  |
| C | -8.428083 | 6.632516  | 1.040830  |
| C | -3.023142 | 2.404299  | 0.175815  |
| C | -3.970235 | 3.156863  | 0.310272  |
| C | 4.674659  | -3.447860 | -0.897317 |
| C | 4.712794  | -4.851509 | -0.384461 |
| C | 5.880702  | -3.178467 | -1.495451 |
| C | 6.865890  | -6.442008 | -0.651387 |
| C | 7.944229  | -4.702694 | -1.751257 |
| C | 8.123447  | -5.995535 | -1.325164 |
| C | 9.259285  | -6.803706 | -1.464303 |
| C | 10.232126 | -7.528154 | -1.568364 |
| C | 11.374255 | -8.327513 | -1.706920 |

|   |           |            |           |
|---|-----------|------------|-----------|
| C | 11.566108 | -9.619459  | -1.282582 |
| C | 12.629571 | -7.865672  | -2.373695 |
| C | 13.658780 | -11.110057 | -1.506044 |
| C | 14.811753 | -9.420212  | -2.606346 |
| C | 14.870598 | -10.818381 | -2.080376 |
| C | 2.592297  | -1.885250  | -0.620636 |
| C | 3.568221  | -2.599831  | -0.758498 |
| C | 18.140819 | -13.134201 | -2.401365 |
| C | 19.349444 | -12.829055 | -2.974186 |
| C | 18.215367 | -14.533748 | -1.876928 |
| C | 21.472409 | -14.296296 | -3.163195 |
| C | 20.438535 | -16.053404 | -2.081095 |
| C | 21.672226 | -15.563339 | -2.720545 |
| C | 16.002246 | -11.638062 | -2.186377 |
| C | 17.003953 | -12.320791 | -2.295362 |
| H | -0.074581 | -2.182101  | 0.608292  |
| H | -2.429839 | -0.383345  | 0.942219  |
| H | -4.547683 | 5.944516   | -0.453711 |
| H | -6.874357 | 7.771531   | -0.067611 |
| H | -9.251923 | 7.315727   | 1.178286  |
| H | 6.233782  | -2.278602  | -1.978392 |
| H | 8.620026  | -4.040983  | -2.273841 |
| H | 10.896147 | -10.289104 | -0.762547 |
| H | 13.316256 | -12.012771 | -1.020857 |
| H | 19.682932 | -11.920986 | -3.456093 |
| H | 22.132250 | -13.609918 | -3.675875 |
| H | 22.573223 | -16.151213 | -2.804028 |
| O | 2.297203  | 1.021327   | -1.582642 |
| O | -0.350666 | 3.043518   | -1.206942 |
| O | -6.642976 | 2.534223   | 1.705826  |
| O | -9.262631 | 4.603214   | 2.136597  |
| O | 3.887491  | -5.505957  | 0.204519  |
| O | 6.571951  | -7.488924  | -0.128018 |
| O | 12.915642 | -6.812982  | -2.890286 |
| O | 15.636168 | -8.750784  | -3.179869 |
| O | 17.396132 | -15.208375 | -1.300487 |
| O | 20.164889 | -17.106002 | -1.552500 |
| N | -7.149645 | 4.748054   | 1.105880  |
| N | -6.469432 | 5.746163   | 0.447617  |
| N | -0.510235 | -0.175956  | 0.039035  |
| N | 0.163255  | 0.828260   | -0.619621 |

|   |           |            |           |
|---|-----------|------------|-----------|
| N | 6.019034  | -5.295181  | -0.760228 |
| N | 6.685542  | -4.283033  | -1.413928 |
| N | 12.828986 | -10.025566 | -1.618695 |
| N | 13.486084 | -9.005352  | -2.269266 |
| N | 20.185894 | -13.907120 | -2.866869 |
| N | 19.540149 | -14.935636 | -2.220861 |

#### Hexamer

|   |           |            |           |
|---|-----------|------------|-----------|
| C | -1.702571 | 0.288832   | 0.480822  |
| C | -1.904209 | 1.581950   | 0.067774  |
| C | -0.641786 | 2.069914   | -0.567274 |
| C | 1.558989  | 0.540669   | -0.798783 |
| C | 1.621233  | -0.867801  | -0.302977 |
| C | 0.407096  | -1.177082  | 0.259350  |
| C | -5.217975 | 3.834318   | 0.393609  |
| C | -5.421272 | 5.128461   | -0.013762 |
| C | -6.486016 | 3.337861   | 1.014035  |
| C | -7.564615 | 6.567631   | 0.162996  |
| C | -8.715375 | 4.851253   | 1.190980  |
| C | -8.772656 | 6.232919   | 0.682385  |
| C | -3.063299 | 2.360313   | 0.187925  |
| C | -4.054657 | 3.060954   | 0.275802  |
| C | 4.876606  | -3.196708  | -0.663643 |
| C | 4.931897  | -4.598602  | -0.147135 |
| C | 6.085382  | -2.908225  | -1.246996 |
| C | 7.100917  | -6.165640  | -0.415056 |
| C | 8.164803  | -4.411142  | -1.504985 |
| C | 8.351419  | -5.708060  | -1.094436 |
| C | 9.483753  | -6.516779  | -1.256346 |
| C | 10.446976 | -7.250721  | -1.381295 |
| C | 11.570043 | -8.071688  | -1.546422 |
| C | 11.748061 | -9.362600  | -1.113698 |
| C | 12.810682 | -7.645879  | -2.263372 |
| C | 13.781511 | -10.915849 | -1.427012 |
| C | 14.932122 | -9.267155  | -2.591249 |
| C | 14.968456 | -10.668125 | -2.070748 |
| C | 2.753011  | -1.684778  | -0.422569 |
| C | 3.750794  | -2.371746  | -0.543254 |
| C | 18.093224 | -13.142135 | -2.586965 |
| C | 19.271520 | -12.920516 | -3.256545 |

|   |           |            |           |
|---|-----------|------------|-----------|
| C | 18.123002 | -14.532960 | -2.040844 |
| C | 21.263283 | -14.519254 | -3.614332 |
| C | 20.200549 | -16.199630 | -2.413071 |
| C | 21.421497 | -15.812940 | -3.184403 |
| C | 22.506654 | -16.673400 | -3.398412 |
| C | 23.430274 | -17.448049 | -3.566515 |
| C | 24.510699 | -18.314774 | -3.782921 |
| C | 24.663208 | -19.604511 | -3.340761 |
| C | 25.726719 | -17.947949 | -4.574087 |
| C | 26.628584 | -21.237877 | -3.747181 |
| C | 27.770543 | -19.663581 | -4.990003 |
| C | 27.770104 | -21.035303 | -4.452144 |
| C | 16.056055 | -11.533896 | -2.244540 |
| C | 17.014259 | -12.265577 | -2.413472 |
| H | 0.065952  | -2.092464  | 0.721327  |
| H | -2.373878 | -0.397342  | 0.976940  |
| H | -4.748751 | 5.819412   | -0.501961 |
| H | -7.218133 | 7.481628   | -0.299512 |
| H | -9.656429 | 6.849900   | 0.734041  |
| H | 6.428706  | -2.004557  | -1.729856 |
| H | 8.833027  | -3.742528  | -2.028535 |
| H | 11.081239 | -10.011834 | -0.564575 |
| H | 13.432956 | -11.807565 | -0.926011 |
| H | 19.619755 | -12.043637 | -3.783352 |
| H | 21.922919 | -13.892646 | -4.197314 |
| H | 24.003835 | -20.219529 | -2.744914 |
| H | 26.268350 | -22.105179 | -3.211114 |
| H | 28.572038 | -21.738645 | -4.615227 |
| O | 2.381627  | 1.225086   | -1.357004 |
| O | -0.362068 | 3.131586   | -1.068498 |
| O | -6.763952 | 2.268104   | 1.500812  |
| O | -9.544862 | 4.150602   | 1.723245  |
| O | 4.108465  | -5.267291  | 0.428292  |
| O | 6.812989  | -7.220705  | 0.095220  |
| O | 13.099452 | -6.607599  | -2.806470 |
| O | 15.744163 | -8.629201  | -3.215601 |
| O | 17.312455 | -15.151924 | -1.395322 |
| O | 19.902699 | -17.229415 | -1.858546 |
| O | 26.020615 | -16.926513 | -5.147563 |
| O | 28.570457 | -19.061342 | -5.667996 |
| N | -7.357625 | 4.461865   | 0.906967  |

|   |           |            |           |
|---|-----------|------------|-----------|
| N | -6.700886 | 5.503925   | 0.294535  |
| N | -0.424332 | -0.094044  | 0.170079  |
| N | 0.231700  | 0.944014   | -0.452792 |
| N | 6.252938  | -5.017814  | -0.497067 |
| N | 6.909717  | -3.997322  | -1.147689 |
| N | 12.991012 | -9.799270  | -1.485051 |
| N | 13.648240 | -8.800812  | -2.168590 |
| N | 20.052584 | -14.042021 | -3.185572 |
| N | 19.398190 | -15.017940 | -2.467740 |
| N | 25.866769 | -20.091675 | -3.773472 |
| N | 26.521975 | -19.130340 | -4.507472 |

### Heptamer

|   |           |            |           |
|---|-----------|------------|-----------|
| C | -1.752248 | 0.326406   | 0.389378  |
| C | -1.854794 | 1.666210   | 0.110281  |
| C | -0.546441 | 2.126882   | -0.447459 |
| C | 1.557654  | 0.484128   | -0.776039 |
| C | 1.516284  | -0.965712  | -0.415952 |
| C | 0.265147  | -1.248925  | 0.074330  |
| C | -4.999575 | 4.116819   | 0.625231  |
| C | -5.093250 | 5.458019   | 0.352087  |
| C | -6.312713 | 3.663021   | 1.181024  |
| C | -7.101103 | 7.050722   | 0.709606  |
| C | -8.399916 | 5.336934   | 1.548128  |
| C | -8.328867 | 6.770334   | 1.214599  |
| C | -2.958728 | 2.509767   | 0.293229  |
| C | -3.897537 | 3.270394   | 0.439830  |
| C | 4.663009  | -3.422235  | -0.879693 |
| C | 4.635428  | -4.870282  | -0.508860 |
| C | 5.909536  | -3.131715  | -1.375953 |
| C | 6.758653  | -6.493440  | -0.815416 |
| C | 7.944281  | -4.687424  | -1.670251 |
| C | 8.063801  | -6.022296  | -1.371226 |
| C | 9.182529  | -6.849513  | -1.534343 |
| C | 10.138089 | -7.592698  | -1.663393 |
| C | 11.261095 | -8.413620  | -1.828660 |
| C | 11.394832 | -9.745526  | -1.523136 |
| C | 12.558341 | -7.933620  | -2.395745 |
| C | 13.444949 | -11.281955 | -1.815905 |
| C | 14.696443 | -9.536111  | -2.701249 |



|   |           |            |           |
|---|-----------|------------|-----------|
| C | 14.686886 | -10.981038 | -2.317908 |
| C | 2.604008  | -1.834435  | -0.573432 |
| C | 3.570326  | -2.559691  | -0.722706 |
| C | 17.881383 | -13.376759 | -2.771901 |
| C | 19.116593 | -13.066063 | -3.284847 |
| C | 17.889155 | -14.819501 | -2.381029 |
| C | 21.180426 | -14.582051 | -3.583689 |
| C | 20.042749 | -16.401182 | -2.692339 |
| C | 21.330863 | -15.910378 | -3.271163 |
| C | 22.463536 | -16.717145 | -3.440681 |
| C | 23.432246 | -17.441981 | -3.575875 |
| C | 24.569779 | -18.241066 | -3.749225 |
| C | 24.735234 | -19.567153 | -3.432530 |
| C | 25.848517 | -17.740612 | -4.339048 |
| C | 26.812359 | -21.064822 | -3.739149 |
| C | 28.014225 | -19.302555 | -4.658864 |
| C | 28.040049 | -20.743645 | -4.261626 |
| C | 29.160221 | -21.570312 | -4.421440 |
| C | 30.152451 | -22.258250 | -4.575165 |
| C | 31.277292 | -23.079319 | -4.736057 |
| C | 31.321020 | -24.520026 | -4.333970 |
| C | 32.498846 | -22.747411 | -5.265008 |
| C | 33.520862 | -26.055971 | -4.641651 |
| C | 34.599185 | -24.230795 | -5.554492 |
| C | 34.771375 | -25.534776 | -5.221021 |
| C | 15.791466 | -11.829072 | -2.469972 |
| C | 16.771846 | -12.535696 | -2.616947 |
| H | -0.147320 | -2.179723  | 0.436569  |
| H | -2.480250 | -0.357863  | 0.800964  |
| H | -4.359542 | 6.139482   | -0.054508 |
| H | -6.672499 | 7.978554   | 0.356355  |
| H | -9.147781 | 7.457124   | 1.363176  |
| H | 6.313253  | -2.199808  | -1.745026 |
| H | 8.665984  | -3.998822  | -2.085778 |
| H | 10.682643 | -10.438498 | -1.098580 |
| H | 13.053267 | -12.215103 | -1.437091 |
| H | 19.495813 | -12.130823 | -3.671137 |
| H | 21.882234 | -13.883970 | -4.017044 |
| H | 24.043160 | -20.270055 | -2.991295 |
| H | 26.445385 | -22.001948 | -3.345771 |
| H | 32.854182 | -21.807168 | -5.662160 |

|   |           |            |           |
|---|-----------|------------|-----------|
| H | 35.277455 | -23.514747 | -5.997867 |
| H | 35.663283 | -26.129470 | -5.344314 |
| O | 2.441690  | 1.164975   | -1.236187 |
| O | -0.181303 | 3.212978   | -0.826554 |
| O | -6.680116 | 2.576430   | 1.559042  |
| O | -9.284382 | 4.659039   | 2.017588  |
| O | 3.759524  | -5.554531  | -0.038992 |
| O | 6.406752  | -7.578305  | -0.420954 |
| O | 12.897782 | -6.847443  | -2.797449 |
| O | 15.563424 | -8.845445  | -3.178397 |
| O | 17.032957 | -15.516444 | -1.893639 |
| O | 19.718123 | -17.488373 | -2.281445 |
| O | 26.160248 | -16.651809 | -4.756390 |
| O | 28.860020 | -18.598947 | -5.155064 |
| O | 30.482635 | -25.227300 | -3.828574 |
| O | 33.222140 | -27.145324 | -4.210016 |
| N | -7.094895 | 4.855854   | 1.171929  |
| N | -6.346975 | 5.899568   | 0.678322  |
| N | -0.496902 | -0.112440  | 0.059328  |
| N | 0.243001  | 0.935259   | -0.441590 |
| N | 5.951717  | -5.313643  | -0.847875 |
| N | 6.681251  | -4.262833  | -1.357562 |
| N | 12.659720 | -10.160567 | -1.843118 |
| N | 13.375615 | -9.105927  | -2.364138 |
| N | 19.912957 | -14.178968 | -3.258007 |
| N | 19.211934 | -15.238159 | -2.726175 |
| N | 26.003157 | -19.959298 | -3.765729 |
| N | 26.689991 | -18.895692 | -4.307011 |
| N | 32.643651 | -24.914213 | -4.694560 |
| N | 33.315501 | -23.845456 | -5.241057 |

#### Octamer

|   |           |           |           |
|---|-----------|-----------|-----------|
| C | -1.787152 | 0.279981  | 0.391473  |
| C | -1.878261 | 1.635824  | 0.199790  |
| C | -0.547418 | 2.130084  | -0.269005 |
| C | 1.568843  | 0.507844  | -0.620620 |
| C | 1.512123  | -0.963316 | -0.363941 |
| C | 0.241722  | -1.275788 | 0.053707  |
| C | -5.041670 | 4.056312  | 0.742394  |
| C | -5.122611 | 5.412372  | 0.550785  |

|   |           |            |           |
|---|-----------|------------|-----------|
| C | -6.377078 | 3.573116   | 1.213956  |
| C | -7.144550 | 6.985376   | 0.916053  |
| C | -8.478938 | 5.226921   | 1.590217  |
| C | -8.394272 | 6.677419   | 1.345480  |
| C | -2.989283 | 2.467935   | 0.391979  |
| C | -3.933476 | 3.219781   | 0.548932  |
| C | 4.675100  | -3.390375  | -0.870063 |
| C | 4.629638  | -4.862141  | -0.611171 |
| C | 5.942947  | -3.068535  | -1.286557 |
| C | 6.763191  | -6.466501  | -0.943949 |
| C | 7.987551  | -4.606198  | -1.606126 |
| C | 8.092457  | -5.960241  | -1.403494 |
| C | 9.216588  | -6.777824  | -1.577605 |
| C | 10.175709 | -7.514304  | -1.718132 |
| C | 11.302353 | -8.328515  | -1.891681 |
| C | 11.413485 | -9.681733  | -1.688192 |
| C | 12.629818 | -7.816126  | -2.350330 |
| C | 13.468341 | -11.208093 | -1.997636 |
| C | 14.773620 | -9.408343  | -2.672499 |
| C | 14.736569 | -10.879209 | -2.408167 |
| C | 2.605189  | -1.822287  | -0.537072 |
| C | 3.576989  | -2.537781  | -0.697454 |
| C | 17.929198 | -13.273264 | -2.883370 |
| C | 19.197356 | -12.944217 | -3.293980 |
| C | 17.892336 | -14.744152 | -2.619114 |
| C | 21.252450 | -14.470241 | -3.603360 |
| C | 20.036401 | -16.336054 | -2.941289 |
| C | 21.363822 | -15.823427 | -3.399811 |
| C | 22.490638 | -16.637425 | -3.573234 |
| C | 23.449957 | -17.373661 | -3.713690 |
| C | 24.574378 | -18.190875 | -3.887671 |
| C | 24.679768 | -19.544853 | -3.684824 |
| C | 25.903442 | -17.684221 | -4.347342 |
| C | 26.725095 | -21.081738 | -4.003622 |
| C | 28.037730 | -19.287754 | -4.679316 |
| C | 27.992924 | -20.759430 | -4.419808 |
| C | 29.091538 | -21.611527 | -4.591686 |
| C | 30.063800 | -22.326528 | -4.751462 |
| C | 31.157456 | -23.184886 | -4.923902 |
| C | 31.101617 | -24.655970 | -4.666594 |
| C | 32.427766 | -22.871775 | -5.341347 |

|   |           |            |           |
|---|-----------|------------|-----------|
| C | 33.219177 | -26.276914 | -5.016473 |
| C | 34.457899 | -24.426273 | -5.677348 |
| C | 34.549927 | -25.781927 | -5.484770 |
| C | 35.661691 | -26.613318 | -5.675785 |
| C | 36.606572 | -27.364532 | -5.831618 |
| C | 37.715507 | -28.200357 | -6.023885 |
| C | 37.797382 | -29.556214 | -5.831237 |
| C | 39.050827 | -27.716466 | -6.494975 |
| C | 39.819866 | -31.128350 | -6.197018 |
| C | 41.153261 | -29.369366 | -6.871778 |
| C | 41.069025 | -30.820022 | -6.627808 |
| C | 15.842441 | -11.723717 | -2.570182 |
| C | 16.823237 | -12.428891 | -2.721271 |
| H | -0.185717 | -2.228135  | 0.333088  |
| H | -2.531821 | -0.428832  | 0.724130  |
| H | -4.372155 | 6.115269   | 0.217939  |
| H | -6.701273 | 7.931759   | 0.638189  |
| H | -9.220129 | 7.355434   | 1.495909  |
| H | 6.363634  | -2.113195  | -1.565822 |
| H | 8.727731  | -3.891296  | -1.935882 |
| H | 10.676749 | -10.400025 | -1.358131 |
| H | 13.052699 | -12.165108 | -1.716487 |
| H | 19.612882 | -11.987140 | -3.575089 |
| H | 21.989078 | -13.751808 | -3.933355 |
| H | 23.939854 | -20.259947 | -3.354890 |
| H | 26.304812 | -22.037168 | -3.724055 |
| H | 32.854675 | -21.919270 | -5.620997 |
| H | 35.202231 | -23.717087 | -6.009964 |
| H | 37.047229 | -30.259465 | -5.498455 |
| H | 39.376980 | -32.074957 | -5.919292 |
| H | 41.894777 | -31.497860 | -6.779598 |
| O | 2.471334  | 1.216032   | -0.995823 |
| O | -0.167128 | 3.238478   | -0.557904 |
| O | -6.761214 | 2.465947   | 1.505816  |
| O | -9.383954 | 4.523561   | 1.975496  |
| O | 3.732823  | -5.576167  | -0.234284 |
| O | 6.393164  | -7.576616  | -0.648830 |
| O | 12.994903 | -6.704234  | -2.644734 |
| O | 15.668024 | -8.689488  | -3.046078 |
| O | 16.998055 | -15.463114 | -2.245451 |
| O | 19.671515 | -17.448004 | -2.646858 |

|   |           |            |           |
|---|-----------|------------|-----------|
| O | 26.273106 | -16.574003 | -4.642535 |
| O | 28.934348 | -18.573412 | -5.056075 |
| O | 30.199507 | -25.364568 | -4.291253 |
| O | 32.839588 | -27.385405 | -4.727026 |
| O | 39.434163 | -26.609288 | -6.787842 |
| O | 42.057614 | -28.665754 | -7.258145 |
| N | -7.156276 | 4.767438   | 1.250445  |
| N | -6.387691 | 5.837283   | 0.854198  |
| N | -0.518504 | -0.138488  | 0.086670  |
| N | 0.241802  | 0.938984   | -0.309632 |
| N | 5.959579  | -5.284191  | -0.923024 |
| N | 6.712149  | -4.201087  | -1.318946 |
| N | 12.691289 | -10.081159 | -1.975169 |
| N | 13.438659 | -8.994644  | -2.371634 |
| N | 19.974520 | -14.071065 | -3.316606 |
| N | 19.227296 | -15.157708 | -2.920210 |
| N | 25.955265 | -19.949585 | -3.972125 |
| N | 26.707408 | -18.866286 | -4.368325 |
| N | 32.428981 | -25.086414 | -4.977199 |
| N | 33.188713 | -24.008607 | -5.373685 |
| N | 39.063157 | -29.980274 | -6.132947 |
| N | 39.831214 | -28.910087 | -6.529332 |

#### Nonamer

|   |           |            |           |
|---|-----------|------------|-----------|
| C | 1.541889  | -3.007390  | -0.085678 |
| C | 1.440575  | -1.652966  | -0.285267 |
| C | 2.769157  | -1.150539  | -0.752018 |
| C | 4.898632  | -2.758722  | -1.088746 |
| C | 4.852083  | -4.229316  | -0.825029 |
| C | 3.583218  | -4.549203  | -0.409029 |
| C | 0.322381  | -0.829269  | -0.101797 |
| C | 8.032363  | -6.637153  | -1.313269 |
| C | 7.995075  | -8.107706  | -1.046794 |
| C | 9.298946  | -6.310054  | -1.729904 |
| C | 10.137654 | -9.701564  | -1.370812 |
| C | 11.352305 | -7.837753  | -2.041096 |
| C | 11.464288 | -9.190262  | -1.832700 |
| C | 12.592117 | -10.003354 | -2.003812 |
| C | 13.553756 | -10.737008 | -2.141867 |
| C | 14.682454 | -11.548897 | -2.312890 |

|   |           |            |           |
|---|-----------|------------|-----------|
| C | 14.796816 | -12.901015 | -2.103725 |
| C | 16.008213 | -11.035533 | -2.775296 |
| C | 16.853874 | -14.424623 | -2.411093 |
| C | 18.154500 | -12.625034 | -3.095373 |
| C | 18.120473 | -14.095103 | -2.825961 |
| C | 5.951812  | -5.080899  | -0.991720 |
| C | 6.928878  | -5.790371  | -1.146807 |
| C | 21.311593 | -16.490958 | -3.302135 |
| C | 22.579240 | -16.165385 | -3.717128 |
| C | 21.272778 | -17.960996 | -3.033570 |
| C | 24.630189 | -17.696472 | -4.029594 |
| C | 23.412371 | -19.558059 | -3.358922 |
| C | 24.739194 | -19.049478 | -3.823691 |
| C | 25.863100 | -19.866878 | -3.999949 |
| C | 26.819263 | -20.606753 | -4.142772 |
| C | 27.939607 | -21.428947 | -4.319575 |
| C | 28.039752 | -22.783032 | -4.114741 |
| C | 29.269085 | -20.929036 | -4.785348 |
| C | 30.076577 | -24.329801 | -4.439760 |
| C | 31.394597 | -22.542936 | -5.123787 |
| C | 31.344004 | -24.014044 | -4.862089 |
| C | 32.437676 | -24.871702 | -5.037788 |
| C | 33.405508 | -25.591929 | -5.200954 |
| C | 34.493750 | -26.456377 | -5.377183 |
| C | 34.430968 | -27.926845 | -5.117996 |
| C | 35.763903 | -26.150701 | -5.800569 |
| C | 36.537865 | -29.559871 | -5.475894 |
| C | 37.783796 | -27.716809 | -6.144349 |
| C | 37.869117 | -29.072786 | -5.950987 |
| C | 38.975301 | -29.910544 | -6.146531 |
| C | 39.915254 | -30.667088 | -6.306323 |
| C | 41.018804 | -31.508933 | -6.503253 |
| C | 41.094512 | -32.865053 | -6.309931 |
| C | 42.354303 | -31.032412 | -6.981285 |
| C | 43.107665 | -34.447704 | -6.682062 |
| C | 44.446955 | -32.696216 | -7.364605 |
| C | 44.356776 | -34.146009 | -7.117655 |
| C | 19.226833 | -14.938915 | -2.988257 |
| C | 20.207163 | -15.644650 | -3.139737 |
| C | -0.628760 | -0.084240  | 0.047596  |
| C | -1.743458 | 0.744080   | 0.231948  |

|   |            |            |           |
|---|------------|------------|-----------|
| C | -1.835165  | 2.100176   | 0.035114  |
| C | -3.074837  | 0.250518   | 0.698013  |
| C | -3.860709  | 3.659115   | 0.375262  |
| C | -5.188076  | 1.876980   | 1.052036  |
| C | -5.128446  | 3.349312   | 0.799586  |
| C | -6.216501  | 4.212864   | 0.984512  |
| C | -7.179605  | 4.937125   | 1.155615  |
| C | -8.263628  | 5.806407   | 1.341363  |
| C | -9.532647  | 5.502216   | 1.764493  |
| C | -8.197006  | 7.280796   | 1.094385  |
| C | -11.546054 | 7.087270   | 2.126894  |
| C | -10.306787 | 8.922644   | 1.476497  |
| C | -11.613865 | 8.430345   | 1.945832  |
| H | 3.161975   | -5.503280  | -0.126221 |
| H | 0.801689   | -3.720354  | 0.248115  |
| H | 9.714350   | -5.353743  | -2.013764 |
| H | 12.088570  | -7.120353  | -2.374165 |
| H | 14.061976  | -13.619517 | -1.769901 |
| H | 16.440439  | -15.381379 | -2.125846 |
| H | 22.995713  | -15.209911 | -4.002265 |
| H | 25.367128  | -16.980440 | -4.364080 |
| H | 27.297914  | -23.494239 | -3.780745 |
| H | 29.653031  | -25.282876 | -4.157100 |
| H | 36.194788  | -25.200870 | -6.083204 |
| H | 38.530496  | -27.012114 | -6.481173 |
| H | 40.342366  | -33.564105 | -5.972832 |
| H | 42.661340  | -35.391704 | -6.400989 |
| H | 45.178816  | -34.827988 | -7.271039 |
| H | -1.089272  | 2.808245   | -0.296561 |
| H | -3.431614  | 4.611084   | 0.097322  |
| H | -9.966478  | 4.551527   | 2.040200  |
| H | -12.289880 | 6.376201   | 2.459235  |
| H | -12.467512 | 9.070150   | 2.108034  |
| O | 5.796755   | -2.046062  | -1.465396 |
| O | 3.141529   | -0.040949  | -1.045871 |
| O | 7.101870   | -8.825040  | -0.667560 |
| O | 9.773508   | -10.812385 | -1.071190 |
| O | 16.370426  | -9.924170  | -3.075131 |
| O | 19.046712  | -11.906103 | -3.473916 |
| O | 20.378117  | -18.677292 | -2.655687 |
| O | 23.045993  | -20.668590 | -3.061021 |

|   |            |            |           |
|---|------------|------------|-----------|
| O | 29.642502  | -19.821043 | -5.084137 |
| O | 32.292830  | -21.833384 | -5.505689 |
| O | 33.526614  | -28.630069 | -4.737970 |
| O | 36.153419  | -30.665960 | -5.183685 |
| O | 42.742077  | -29.927428 | -7.276583 |
| O | 45.353358  | -31.997506 | -7.755037 |
| O | -3.455186  | -0.856668  | 0.991711  |
| O | -6.089983  | 1.171074   | 1.432580  |
| O | -7.287364  | 7.980541   | 0.718259  |
| O | -9.914482  | 10.030689  | 1.192634  |
| N | 2.814421   | -3.416958  | -0.383153 |
| N | 3.567816   | -2.335735  | -0.782647 |
| N | 9.327947   | -8.523437  | -1.354369 |
| N | 10.074668  | -7.438061  | -1.755169 |
| N | 16.075120  | -13.298767 | -2.390179 |
| N | 16.819745  | -12.212339 | -2.792034 |
| N | 23.354344  | -17.293660 | -3.738370 |
| N | 22.606239  | -18.377751 | -3.336664 |
| N | 29.312295  | -23.193937 | -4.406156 |
| N | 30.067761  | -22.114702 | -4.807110 |
| N | 35.754593  | -28.364898 | -5.433832 |
| N | 36.518464  | -27.291722 | -5.834919 |
| N | 42.356401  | -33.296051 | -6.618019 |
| N | 43.128058  | -32.230226 | -7.019121 |
| N | -3.103852  | 2.517757   | 0.331596  |
| N | -3.865551  | 1.441322   | 0.728035  |
| N | -10.281291 | 6.647286   | 1.808412  |
| N | -9.515494  | 7.720232   | 1.415177  |

#### Decamer

|   |          |           |           |
|---|----------|-----------|-----------|
| C | 1.499233 | -2.982546 | -0.087887 |
| C | 1.396401 | -1.626990 | -0.279597 |
| C | 2.727696 | -1.118360 | -0.731384 |
| C | 4.863620 | -2.719501 | -1.060541 |
| C | 4.818164 | -4.192053 | -0.807245 |
| C | 3.546708 | -4.517565 | -0.404006 |
| C | 0.274670 | -0.807186 | -0.100660 |
| C | 8.006680 | -6.590748 | -1.286508 |
| C | 7.968701 | -8.063372 | -1.031907 |
| C | 9.276465 | -6.259075 | -1.689687 |



|   |           |            |           |
|---|-----------|------------|-----------|
| C | 10.115288 | -9.652634  | -1.351813 |
| C | 11.333695 | -7.782363  | -1.996893 |
| C | 11.445056 | -9.136489  | -1.799297 |
| C | 12.574472 | -9.947661  | -1.968990 |
| C | 13.537047 | -10.680237 | -2.106217 |
| C | 14.666497 | -11.491366 | -2.275884 |
| C | 14.777955 | -12.845473 | -2.078220 |
| C | 15.996241 | -10.975144 | -2.723358 |
| C | 16.835228 | -14.368672 | -2.385593 |
| C | 18.142866 | -12.564309 | -3.043442 |
| C | 18.104941 | -14.036956 | -2.788958 |
| C | 5.921091  | -5.040076  | -0.970878 |
| C | 6.900741  | -5.746610  | -1.123016 |
| C | 21.293579 | -16.435396 | -3.268689 |
| C | 22.564914 | -16.109736 | -3.672196 |
| C | 21.248409 | -17.907915 | -3.015159 |
| C | 24.612622 | -17.644446 | -3.988312 |
| C | 23.384576 | -19.508738 | -3.344322 |
| C | 24.715734 | -18.999943 | -3.796324 |
| C | 25.837630 | -19.819543 | -3.975141 |
| C | 26.791707 | -20.561598 | -4.120577 |
| C | 27.909645 | -21.386517 | -4.299917 |
| C | 28.002958 | -22.743093 | -4.108798 |
| C | 29.243761 | -20.887407 | -4.753096 |
| C | 30.034775 | -24.295168 | -4.439621 |
| C | 31.364082 | -22.506892 | -5.097619 |
| C | 31.305691 | -23.980507 | -4.852137 |
| C | 32.396463 | -24.841085 | -5.031556 |
| C | 33.361911 | -25.563866 | -5.197518 |
| C | 34.447166 | -26.431332 | -5.377305 |
| C | 34.376579 | -27.904052 | -5.133413 |
| C | 35.720768 | -26.127050 | -5.791232 |
| C | 36.478014 | -29.542772 | -5.497445 |
| C | 37.735417 | -27.698603 | -6.140898 |
| C | 37.813767 | -29.056835 | -5.960929 |
| C | 38.917273 | -29.897442 | -6.159364 |
| C | 39.854807 | -30.656390 | -6.321951 |
| C | 40.955795 | -31.500950 | -6.521576 |
| C | 41.024885 | -32.859178 | -6.341034 |
| C | 42.295691 | -31.025424 | -6.988150 |
| C | 43.033222 | -34.446640 | -6.718651 |

|   |            |            |           |
|---|------------|------------|-----------|
| C | 44.383226  | -32.694263 | -7.377387 |
| C | 44.285698  | -34.146022 | -7.145227 |
| C | 19.210892  | -14.881039 | -2.952654 |
| C | 20.190574  | -15.587497 | -3.104945 |
| C | -0.679204  | -0.064899  | 0.044935  |
| C | -1.796847  | 0.760386   | 0.224440  |
| C | -1.889605  | 2.117062   | 0.033764  |
| C | -3.131178  | 0.261668   | 0.677418  |
| C | -3.920943  | 3.669775   | 0.364528  |
| C | -5.251011  | 1.881818   | 1.021857  |
| C | -5.192102  | 3.355439   | 0.776545  |
| C | -6.282657  | 4.216339   | 0.955739  |
| C | -7.247901  | 4.939434   | 1.121526  |
| C | -8.332838  | 5.807318   | 1.301209  |
| C | -9.606735  | 5.503466   | 1.714541  |
| C | -8.261464  | 7.280109   | 1.057969  |
| C | -11.620646 | 7.075889   | 2.064547  |
| C | -10.362123 | 8.919738   | 1.422368  |
| C | -11.698199 | 8.434277   | 1.885415  |
| C | -12.801231 | 9.275397   | 2.084318  |
| C | -13.738301 | 10.034791  | 2.247488  |
| C | -14.838836 | 10.879804  | 2.447685  |
| C | -16.178989 | 10.404687  | 2.913932  |
| C | -14.907119 | 12.238231  | 2.268298  |
| C | -18.267314 | 12.073657  | 3.298803  |
| C | -16.916182 | 13.825812  | 2.641779  |
| C | -18.169954 | 13.525069  | 3.064438  |
| H | 3.125204   | -5.474454  | -0.131278 |
| H | 0.757812   | -3.699392  | 0.234735  |
| H | 9.693210   | -5.300155  | -1.962580 |
| H | 12.071870  | -7.061635  | -2.318337 |
| H | 14.039823  | -13.566244 | -1.756772 |
| H | 16.418528  | -15.327618 | -2.112719 |
| H | 22.986213  | -15.152815 | -3.945127 |
| H | 25.353876  | -16.927519 | -4.311136 |
| H | 27.256282  | -23.454597 | -3.786418 |
| H | 29.605605  | -25.249348 | -4.169452 |
| H | 36.157263  | -25.176330 | -6.062018 |
| H | 38.486914  | -26.993870 | -6.466793 |
| H | 40.268133  | -33.558302 | -6.014564 |
| H | 42.581537  | -35.391445 | -6.449085 |

|   |            |            |           |
|---|------------|------------|-----------|
| H | 45.105568  | -34.829980 | -7.301388 |
| H | -1.142631  | 2.828363   | -0.288376 |
| H | -3.491402  | 4.623856   | 0.094601  |
| H | -10.043771 | 4.552843   | 1.984796  |
| H | -12.372570 | 6.371387   | 2.389955  |
| H | -14.150027 | 12.937133  | 1.942140  |
| H | -16.464224 | 14.770406  | 2.371933  |
| H | -18.990794 | 14.208760  | 3.216619  |
| O | 5.763223   | -2.002404  | -1.424924 |
| O | 3.099903   | -0.005990  | -1.014827 |
| O | 7.073000   | -8.784598  | -0.666219 |
| O | 9.749699   | -10.766272 | -1.064775 |
| O | 16.361742  | -9.861499  | -3.010481 |
| O | 19.038487  | -11.843057 | -3.409273 |
| O | 20.348990  | -18.625106 | -2.650506 |
| O | 23.012618  | -20.621115 | -3.060583 |
| O | 29.623449  | -19.777954 | -5.038257 |
| O | 32.267333  | -21.797293 | -5.467397 |
| O | 33.467211  | -28.607044 | -4.765107 |
| O | 36.087218  | -30.650047 | -5.218462 |
| O | 42.689523  | -29.919272 | -7.270790 |
| O | 45.294459  | -31.995641 | -7.756573 |
| O | -3.511351  | -0.847739  | 0.962109  |
| O | -6.154628  | 1.172429   | 1.391144  |
| O | -7.351611  | 7.982831   | 0.690343  |
| O | -9.970653  | 10.026968  | 1.144154  |
| O | -16.573719 | 9.298408   | 3.194826  |
| O | -19.179643 | 11.374973  | 3.675223  |
| N | 2.775138   | -3.387009  | -0.376687 |
| N | 3.529442   | -2.301442  | -0.762490 |
| N | 9.304750   | -8.475174  | -1.330878 |
| N | 10.053632  | -7.385923  | -1.716855 |
| N | 16.058081  | -13.241815 | -2.358107 |
| N | 16.806902  | -12.152520 | -2.744080 |
| N | 23.336661  | -17.240169 | -3.699488 |
| N | 22.582600  | -18.325804 | -3.313399 |
| N | 29.275381  | -23.156306 | -4.397374 |
| N | 30.037624  | -22.076151 | -4.782717 |
| N | 35.699839  | -28.344783 | -5.447059 |
| N | 36.470447  | -27.271019 | -5.833406 |
| N | 42.286583  | -33.292441 | -6.646723 |

|   |            |            |           |
|---|------------|------------|-----------|
| N | 43.064709  | -32.226030 | -7.033508 |
| N | -3.161830  | 2.530715   | 0.322565  |
| N | -3.924508  | 1.450753   | 0.707581  |
| N | -10.355905 | 6.647763   | 1.756863  |
| N | -9.584653  | 7.721320   | 1.371227  |
| N | -16.946806 | 11.605950  | 2.961929  |
| N | -16.168167 | 12.672159  | 2.575661  |

#### Dodecamer

|   |           |            |           |
|---|-----------|------------|-----------|
| C | 1.503348  | -2.827051  | -0.018860 |
| C | 1.400641  | -1.469151  | -0.193680 |
| C | 2.737973  | -0.951661  | -0.616535 |
| C | 4.881457  | -2.544830  | -0.936718 |
| C | 4.834250  | -4.021232  | -0.706842 |
| C | 3.557807  | -4.354190  | -0.326292 |
| C | 0.273705  | -0.654895  | -0.022329 |
| C | 8.025800  | -6.416893  | -1.180965 |
| C | 7.978602  | -7.893292  | -0.951070 |
| C | 9.302238  | -6.083934  | -1.561532 |
| C | 10.122007 | -9.486503  | -1.271551 |
| C | 11.356626 | -7.611116  | -1.869249 |
| C | 11.459284 | -8.969044  | -1.694613 |
| C | 12.586135 | -9.783347  | -1.866286 |
| C | 13.545265 | -10.519947 | -2.006068 |
| C | 14.670049 | -11.337057 | -2.178070 |
| C | 14.767805 | -12.695424 | -2.003672 |
| C | 16.008810 | -10.824536 | -2.602230 |
| C | 16.814379 | -14.231195 | -2.319042 |
| C | 18.144429 | -12.426980 | -2.930734 |
| C | 18.090713 | -13.903745 | -2.704523 |
| C | 5.939667  | -4.866323  | -0.868835 |
| C | 6.920377  | -5.571814  | -1.018955 |
| C | 21.258993 | -16.325387 | -3.202221 |
| C | 22.537207 | -16.006503 | -3.589047 |
| C | 21.195357 | -17.801800 | -2.976965 |
| C | 24.569955 | -17.558163 | -3.918836 |
| C | 23.315896 | -19.420306 | -3.320377 |
| C | 24.656116 | -18.918233 | -3.752685 |
| C | 25.769866 | -19.747103 | -3.939535 |
| C | 26.716490 | -20.497072 | -4.092858 |

C 27.826277 -21.331065 -4.280666  
C 27.903129 -22.691979 -4.114738  
C 29.168795 -20.838620 -4.715924  
C 29.919939 -24.260273 -4.460834  
C 31.273387 -22.475035 -5.076491  
C 31.197171 -23.952144 -4.858479  
C 32.279924 -24.821091 -5.045948  
C 33.239030 -25.550777 -5.218345  
C 34.316869 -26.425728 -5.406319  
C 34.230428 -27.901706 -5.188752  
C 35.596121 -26.126698 -5.806422  
C 36.318611 -29.554173 -5.567016  
C 37.598019 -27.711369 -6.169704  
C 37.662169 -29.073182 -6.012736  
C 38.759195 -29.920626 -6.217927  
C 39.691044 -30.685116 -6.387092  
C 40.786202 -31.535623 -6.593412  
C 40.842734 -32.897204 -6.435166  
C 42.133184 -31.063687 -7.042906  
C 42.842356 -34.494223 -6.819152  
C 44.211459 -32.742495 -7.439077  
C 44.101480 -34.196557 -7.227866  
C 19.190058 -14.755191 -2.874495  
C 20.163835 -15.468689 -3.031745  
C -0.685487 0.081666 0.117245  
C -1.810363 0.898700 0.288998  
C -1.908206 2.257042 0.114448  
C -3.149136 0.386115 0.713038  
C -3.954867 3.792720 0.429701  
C -5.284843 1.988463 1.041431  
C -5.231164 3.465236 0.815277  
C -6.330501 4.316668 0.985377  
C -7.304255 5.030161 1.142788  
C -8.399391 5.886855 1.313424  
C -9.677564 5.567963 1.700377  
C -8.335762 7.363284 1.088259  
C -11.710226 7.119641 2.030607  
C -10.456210 8.981809 1.432138  
C -11.796369 8.479733 1.864638  
C -12.910048 9.308627 2.051805  
C -13.856593 10.058624 2.205486

|   |            |            |           |
|---|------------|------------|-----------|
| C | -14.966280 | 10.892664  | 2.393666  |
| C | -16.308713 | 10.400265  | 2.829225  |
| C | -15.043070 | 12.253609  | 2.227945  |
| C | -18.413216 | 12.036731  | 3.190115  |
| C | -17.059788 | 13.821953  | 2.574365  |
| C | -18.337022 | 13.513824  | 2.972011  |
| C | -19.419780 | 14.382773  | 3.159444  |
| C | -20.378884 | 15.112459  | 3.331855  |
| C | -21.456698 | 15.987433  | 3.519853  |
| C | -21.370183 | 17.463430  | 3.302408  |
| C | -22.735967 | 15.688437  | 3.919920  |
| C | -23.458329 | 19.115949  | 3.680649  |
| C | -24.737833 | 17.273156  | 4.283168  |
| C | -24.801941 | 18.634973  | 4.126227  |
| C | -25.898958 | 19.482444  | 4.331360  |
| C | -26.830785 | 20.246962  | 4.500530  |
| C | -27.925904 | 21.097529  | 4.706822  |
| C | -27.982294 | 22.459127  | 4.548629  |
| C | -29.272922 | 20.625710  | 5.156286  |
| C | -29.982189 | 24.056158  | 4.931181  |
| C | -31.351491 | 22.304526  | 5.550943  |
| C | -31.241637 | 23.758483  | 5.338880  |
| H | 3.133656   | -5.315643  | -0.074535 |
| H | 0.758219   | -3.549748  | 0.281413  |
| H | 9.726380   | -5.122483  | -1.813313 |
| H | 12.101738  | -6.888433  | -2.169593 |
| H | 14.020070  | -13.415346 | -1.703198 |
| H | 16.386412  | -15.191227 | -2.068331 |
| H | 22.971362  | -15.049439 | -3.840484 |
| H | 25.321725  | -16.843724 | -4.222268 |
| H | 27.146468  | -23.400937 | -3.810547 |
| H | 29.478462  | -25.214423 | -4.211174 |
| H | 36.043584  | -25.175682 | -6.057551 |
| H | 38.358498  | -27.008386 | -6.478066 |
| H | 40.078065  | -33.595243 | -6.125247 |
| H | 42.381382  | -35.439406 | -6.567220 |
| H | 44.918282  | -34.884052 | -7.384561 |
| H | -1.160485  | 2.976995   | -0.185986 |
| H | -3.526933  | 4.752772   | 0.179013  |
| H | -10.111702 | 4.610891   | 1.951813  |
| H | -12.461963 | 6.405192   | 2.334100  |

|   |            |            |           |
|---|------------|------------|-----------|
| H | -14.286440 | 12.962544  | 1.923625  |
| H | -16.618334 | 14.776094  | 2.324630  |
| H | -23.183485 | 14.737423  | 4.170961  |
| H | -25.498355 | 16.570177  | 4.591433  |
| H | -27.217562 | 23.157081  | 4.238675  |
| H | -29.521199 | 25.001272  | 4.679014  |
| H | -32.058739 | 24.445892  | 5.494378  |
| O | 5.784993   | -1.821433  | -1.278053 |
| O | 3.112144   | 0.165148   | -0.879115 |
| O | 7.075066   | -8.616693  | -0.609740 |
| O | 9.747807   | -10.603325 | -1.009069 |
| O | 16.386817  | -9.709217  | -2.865666 |
| O | 19.049879  | -11.707391 | -3.274970 |
| O | 20.284919  | -18.515556 | -2.633528 |
| O | 22.929077  | -20.533646 | -3.061377 |
| O | 29.562792  | -19.728312 | -4.977361 |
| O | 32.187059  | -21.768794 | -5.426569 |
| O | 33.311860  | -28.602111 | -4.838802 |
| O | 35.915359  | -30.662279 | -5.309925 |
| O | 42.538396  | -29.956195 | -7.303346 |
| O | 45.131812  | -32.045035 | -7.797829 |
| O | -3.527071  | -0.729198  | 0.976602  |
| O | -6.190234  | 1.268855   | 1.385778  |
| O | -7.425346  | 8.077052   | 0.744786  |
| O | -10.069396 | 10.095170  | 1.173214  |
| O | -16.702750 | 9.289943   | 3.090545  |
| O | -19.326898 | 11.330484  | 3.540153  |
| O | -20.451582 | 18.163812  | 2.952497  |
| O | -23.055040 | 20.224050  | 3.423596  |
| O | -29.678329 | 19.518226  | 5.416456  |
| O | -32.272101 | 21.607080  | 5.909062  |
| N | 2.784719   | -3.224783  | -0.291487 |
| N | 3.543010   | -2.132544  | -0.649610 |
| N | 9.317078   | -8.305556  | -1.238061 |
| N | 10.075356  | -7.213325  | -1.596236 |
| N | 16.047397  | -13.097823 | -2.276957 |
| N | 16.809670  | -12.008395 | -2.635201 |
| N | 23.296617  | -17.144810 | -3.631189 |
| N | 22.527361  | -18.228951 | -3.271819 |
| N | 29.172607  | -23.114091 | -4.403392 |
| N | 29.949342  | -22.035569 | -4.763531 |

|   |            |            |           |
|---|------------|------------|-----------|
| N | 35.551452  | -28.349801 | -5.501465 |
| N | 36.334984  | -27.277010 | -5.863757 |
| N | 42.102482  | -33.336087 | -6.740889 |
| N | 42.891965  | -32.270034 | -7.104921 |
| N | -3.187885  | 2.659355   | 0.387458  |
| N | -3.950122  | 1.569896   | 0.745683  |
| N | -10.436959 | 6.706275   | 1.742662  |
| N | -9.667734  | 7.790429   | 1.383265  |
| N | -17.089113 | 11.597291  | 2.877357  |
| N | -16.312405 | 12.675795  | 2.517112  |
| N | -22.691169 | 17.911572  | 3.615204  |
| N | -23.474762 | 16.838787  | 3.977380  |
| N | -29.241900 | 22.898168  | 4.854686  |
| N | -30.031466 | 21.832197  | 5.218762  |

**B. Cartesian coordinates of acetylene-linked bimane oligomers optimized with B3LYP/6-311G\*.**

Dimer

|   |           |           |           |
|---|-----------|-----------|-----------|
| C | -1.726108 | 0.258474  | 0.354589  |
| C | -1.904389 | 1.549494  | -0.060976 |
| C | -0.652964 | 1.993706  | -0.749530 |
| C | 1.503609  | 0.383030  | -1.037519 |
| C | 1.524034  | -0.996974 | -0.524356 |
| C | 0.339746  | -1.269400 | 0.073183  |
| C | -5.123441 | 3.899370  | 0.386323  |
| C | -5.301624 | 5.190531  | -0.028832 |
| C | -6.374831 | 3.455084  | 1.074914  |
| C | -7.365023 | 6.720552  | 0.258644  |
| C | -8.528818 | 5.068004  | 1.369267  |
| C | -8.547795 | 6.449379  | 0.859755  |
| C | -3.032831 | 2.362351  | 0.099942  |
| C | -3.995125 | 3.086407  | 0.225066  |
| H | -0.018338 | -2.163824 | 0.560791  |
| H | -2.398034 | -0.400252 | 0.883075  |
| H | -4.629619 | 5.849406  | -0.557032 |
| H | -7.006483 | 7.615465  | -0.227729 |
| H | -9.392115 | 7.110109  | 0.968297  |
| H | 2.370221  | -1.656043 | -0.628378 |
| O | 2.323886  | 1.034239  | -1.626875 |



|   |           |           |           |
|---|-----------|-----------|-----------|
| O | -0.367011 | 3.038879  | -1.265913 |
| O | -6.660613 | 2.409986  | 1.591539  |
| O | -9.348284 | 4.417425  | 1.960451  |
| N | -7.215747 | 4.606163  | 0.985186  |
| N | -6.552763 | 5.613628  | 0.328503  |
| N | -0.475234 | -0.164910 | -0.003319 |
| N | 0.187617  | 0.842335  | -0.660427 |

Trimer

|   |           |           |           |
|---|-----------|-----------|-----------|
| C | -1.707014 | 0.273513  | 0.440296  |
| C | -1.889709 | 1.562030  | 0.014936  |
| C | -0.633735 | 2.013932  | -0.656216 |
| C | 1.534520  | 0.431000  | -0.898892 |
| C | 1.574232  | -0.966807 | -0.373010 |
| C | 0.365072  | -1.238968 | 0.208589  |
| C | -5.125447 | 3.899371  | 0.391221  |
| C | -5.299775 | 5.186829  | -0.038194 |
| C | -6.387934 | 3.456982  | 1.060727  |
| C | -7.377816 | 6.707268  | 0.182694  |
| C | -8.557641 | 5.060444  | 1.285243  |
| C | -8.574382 | 6.433997  | 0.754081  |
| C | -3.024980 | 2.368003  | 0.152537  |
| C | -3.992005 | 3.089476  | 0.256757  |
| C | 4.791060  | -3.335308 | -0.715023 |
| C | 4.844318  | -4.734662 | -0.188973 |
| C | 5.996851  | -3.053019 | -1.296842 |
| C | 7.046515  | -6.292887 | -0.412302 |
| C | 8.092546  | -4.550847 | -1.503650 |
| C | 8.278984  | -5.817704 | -1.063893 |
| C | 2.689694  | -1.803550 | -0.486972 |
| C | 3.671113  | -2.503807 | -0.600804 |
| H | 0.013804  | -2.135999 | 0.694774  |
| H | -2.381054 | -0.388294 | 0.961938  |
| H | -4.620365 | 5.843059  | -0.560210 |
| H | -7.013723 | 7.597780  | -0.307595 |
| H | -9.427265 | 7.088356  | 0.829226  |
| H | 6.340318  | -2.152247 | -1.782002 |
| H | 8.757210  | -3.875897 | -2.021935 |
| H | 9.169928  | -6.416842 | -1.155953 |

|   |           |           |           |
|---|-----------|-----------|-----------|
| O | 2.359882  | 1.082338  | -1.476105 |
| O | -0.344605 | 3.056656  | -1.173688 |
| O | -6.680694 | 2.414958  | 1.579082  |
| O | -9.388451 | 4.410991  | 1.861104  |
| O | 4.022584  | -5.389043 | 0.391319  |
| O | 6.766377  | -7.335383 | 0.115313  |
| N | -7.228799 | 4.606305  | 0.948905  |
| N | -6.556695 | 5.609824  | 0.295231  |
| N | -0.448126 | -0.143574 | 0.103986  |
| N | 0.216387  | 0.866901  | -0.548882 |
| N | 6.161144  | -5.159815 | -0.543611 |
| N | 6.815701  | -4.143645 | -1.195563 |

#### Tetramer

|   |           |            |           |
|---|-----------|------------|-----------|
| C | -0.102680 | -0.444952  | -0.884482 |
| C | -0.131985 | 0.904940   | -0.659293 |
| C | 1.276367  | 1.386849   | -0.528568 |
| C | 3.400627  | -0.261101  | -0.727041 |
| C | 3.261040  | -1.727411  | -0.976840 |
| C | 1.926563  | -2.019360  | -1.074854 |
| C | -3.312498 | 3.328070   | -0.365380 |
| C | -3.339480 | 4.677648   | -0.140959 |
| C | -4.723676 | 2.848943   | -0.492991 |
| C | -5.379103 | 6.253108   | 0.052856  |
| C | -6.851042 | 4.510375   | -0.288440 |
| C | -6.696062 | 5.954231   | -0.042362 |
| C | -1.248031 | 1.742481   | -0.558622 |
| C | -2.195904 | 2.490551   | -0.466788 |
| C | 6.396327  | -4.206839  | -1.273706 |
| C | 6.256890  | -5.673205  | -1.523227 |
| C | 7.730785  | -3.914689  | -1.176006 |
| C | 8.381348  | -7.320921  | -1.721684 |
| C | 9.760190  | -5.488922  | -1.365992 |
| C | 9.789654  | -6.838810  | -1.591179 |
| C | 10.905830 | -7.676164  | -1.691963 |
| C | 11.853861 | -8.424015  | -1.783952 |
| C | 12.970702 | -9.261174  | -1.885650 |
| C | 12.998094 | -10.610814 | -2.109652 |
| C | 14.381752 | -8.781470  | -1.758821 |

|   |           |            |           |
|---|-----------|------------|-----------|
| C | 15.038334 | -12.185002 | -2.307300 |
| C | 16.509779 | -10.441467 | -1.967960 |
| C | 16.355309 | -11.885128 | -2.215586 |
| C | 4.348390  | -2.600738  | -1.082135 |
| C | 5.308932  | -3.333567  | -1.168413 |
| H | 1.432530  | -2.962526  | -1.250498 |
| H | -0.912473 | -1.143134  | -1.029995 |
| H | -2.527955 | 5.374461   | 0.002682  |
| H | -4.876690 | 7.192918   | 0.226935  |
| H | -7.527959 | 6.633945   | 0.042264  |
| H | 8.224716  | -2.971416  | -1.000651 |
| H | 10.569906 | -4.790626  | -1.220594 |
| H | 12.186785 | -11.307962 | -2.252871 |
| H | 14.536190 | -13.124961 | -2.481341 |
| H | 17.187568 | -12.563982 | -2.303508 |
| O | 4.371529  | 0.426394   | -0.575890 |
| O | 1.721649  | 2.482286   | -0.328851 |
| O | -5.167324 | 1.751662   | -0.691521 |
| O | -7.822933 | 3.819928   | -0.437623 |
| O | 5.286057  | -6.360867  | -1.674054 |
| O | 7.936194  | -8.416415  | -1.921374 |
| O | 14.825106 | -7.683902  | -1.561259 |
| O | 17.481544 | -9.750304  | -1.821322 |
| N | -5.484491 | 4.045108   | -0.318108 |
| N | -4.637511 | 5.106596   | -0.112430 |
| N | 1.196512  | -0.874748  | -0.911085 |
| N | 2.041540  | 0.189217   | -0.702901 |
| N | 7.616037  | -6.123371  | -1.547392 |
| N | 8.460950  | -5.059269  | -1.339450 |
| N | 14.296239 | -11.039446 | -2.137647 |
| N | 15.142903 | -9.977580  | -1.932728 |

#### Pentamer

|   |           |           |           |
|---|-----------|-----------|-----------|
| C | -1.739276 | 0.265449  | 0.415551  |
| C | -1.897351 | 1.560157  | 0.000338  |
| C | -0.649785 | 1.978545  | -0.708170 |
| C | 1.468170  | 0.339364  | -1.012110 |
| C | 1.485987  | -1.058723 | -0.485823 |
| C | 0.284247  | -1.301004 | 0.124922  |

|   |           |            |           |
|---|-----------|------------|-----------|
| C | -5.042794 | 3.996446   | 0.494273  |
| C | -5.191685 | 5.289109   | 0.070550  |
| C | -6.290235 | 3.596526   | 1.216390  |
| C | -7.195459 | 6.887454   | 0.399394  |
| C | -8.382076 | 5.281427   | 1.553824  |
| C | -8.368278 | 6.660304   | 1.036121  |
| C | -3.002607 | 2.399368   | 0.177021  |
| C | -3.942424 | 3.150357   | 0.315856  |
| C | 4.644405  | -3.491339  | -0.899666 |
| C | 4.676266  | -4.895689  | -0.389882 |
| C | 5.848355  | -3.225223  | -1.495170 |
| C | 6.833209  | -6.490641  | -0.661357 |
| C | 7.908142  | -4.747762  | -1.753686 |
| C | 8.089249  | -6.038183  | -1.332787 |
| C | 9.225608  | -6.841231  | -1.473514 |
| C | 10.199288 | -7.553643  | -1.580980 |
| C | 11.345223 | -8.343068  | -1.720664 |
| C | 11.541697 | -9.635974  | -1.313374 |
| C | 12.601940 | -7.862645  | -2.370230 |
| C | 13.641846 | -11.110582 | -1.532492 |
| C | 14.799703 | -9.405844  | -2.598963 |
| C | 14.856260 | -10.808783 | -2.087114 |
| C | 2.578291  | -1.921022  | -0.624480 |
| C | 3.543084  | -2.640694  | -0.759955 |
| C | 18.131464 | -13.100937 | -2.390576 |
| C | 19.343807 | -12.779617 | -2.937900 |
| C | 18.205940 | -14.507558 | -1.887233 |
| C | 21.478889 | -14.223617 | -3.121335 |
| C | 20.449539 | -16.009195 | -2.085712 |
| C | 21.684930 | -15.493617 | -2.700300 |
| C | 15.990744 | -11.621059 | -2.188044 |
| C | 16.990011 | -12.297584 | -2.289504 |
| H | -0.077035 | -2.188643  | 0.620955  |
| H | -2.415265 | -0.378599  | 0.956512  |
| H | -4.512454 | 5.922537   | -0.479171 |
| H | -6.820402 | 7.766850   | -0.102546 |
| H | -9.186108 | 7.350087   | 1.164976  |
| H | 6.202914  | -2.325952  | -1.974788 |
| H | 8.583156  | -4.084844  | -2.272657 |
| H | 10.871882 | -10.315230 | -0.808958 |

|   |           |            |           |
|---|-----------|------------|-----------|
| H | 13.298670 | -12.019107 | -1.062164 |
| H | 19.676662 | -11.862425 | -3.399139 |
| H | 22.138892 | -13.524037 | -3.612180 |
| H | 22.591503 | -16.070319 | -2.782603 |
| O | 2.295773  | 0.970348   | -1.608053 |
| O | -0.346433 | 3.015081   | -1.229361 |
| O | -6.594565 | 2.565930   | 1.750640  |
| O | -9.205499 | 4.663597   | 2.173247  |
| O | 3.853273  | -5.543551  | 0.193707  |
| O | 6.544151  | -7.533504  | -0.145108 |
| O | 12.882191 | -6.807424  | -2.866409 |
| O | 15.624009 | -8.732309  | -3.151178 |
| O | 17.386600 | -15.191630 | -1.338711 |
| O | 20.182301 | -17.067579 | -1.583880 |
| N | -7.098162 | 4.771672   | 1.133322  |
| N | -6.420297 | 5.752317   | 0.451363  |
| N | -0.504088 | -0.187261  | 0.037040  |
| N | 0.168718  | 0.806272   | -0.633351 |
| N | 5.983381  | -5.342783  | -0.767657 |
| N | 6.649646  | -4.331051  | -1.417128 |
| N | 12.808724 | -10.029909 | -1.643294 |
| N | 13.465985 | -9.000116  | -2.273175 |
| N | 20.186131 | -13.851552 | -2.834769 |
| N | 19.541105 | -14.894417 | -2.216213 |

#### Hexamer

|   |           |           |           |
|---|-----------|-----------|-----------|
| C | -1.675247 | 0.269678  | 0.445893  |
| C | -1.886805 | 1.563656  | 0.053157  |
| C | -0.623488 | 2.078765  | -0.556870 |
| C | 1.600404  | 0.571679  | -0.783887 |
| C | 1.665080  | -0.843310 | -0.309105 |
| C | 0.448773  | -1.169640 | 0.229685  |
| C | -5.229220 | 3.753735  | 0.376561  |
| C | -5.447253 | 5.049110  | -0.006839 |
| C | -6.496554 | 3.223662  | 0.968544  |
| C | -7.608564 | 6.455050  | 0.170550  |
| C | -8.753314 | 4.707053  | 1.147406  |
| C | -8.816326 | 6.098054  | 0.667036  |
| C | -3.055183 | 2.323926  | 0.171432  |

|   |           |            |           |
|---|-----------|------------|-----------|
| C | -4.054662 | 3.001927   | 0.260253  |
| C | 4.925322  | -3.148946  | -0.654002 |
| C | 4.977165  | -4.554310  | -0.148115 |
| C | 6.136492  | -2.853433  | -1.220065 |
| C | 7.159873  | -6.113073  | -0.410398 |
| C | 8.221774  | -4.343344  | -1.471980 |
| C | 8.412012  | -5.640087  | -1.074947 |
| C | 9.547047  | -6.440859  | -1.236536 |
| C | 10.509536 | -7.165215  | -1.363245 |
| C | 11.630390 | -7.985148  | -1.528579 |
| C | 11.806318 | -9.272685  | -1.096462 |
| C | 12.870017 | -7.560428  | -2.246786 |
| C | 13.829575 | -10.832874 | -1.410379 |
| C | 14.988516 | -9.195290  | -2.577087 |
| C | 15.014090 | -10.595193 | -2.054613 |
| C | 2.802040  | -1.649494  | -0.424939 |
| C | 3.797498  | -2.330104  | -0.538734 |
| C | 18.101653 | -13.098989 | -2.566545 |
| C | 19.274059 | -12.899834 | -3.246049 |
| C | 18.117477 | -14.483239 | -2.004854 |
| C | 21.240654 | -14.522578 | -3.609680 |
| C | 20.176222 | -16.180751 | -2.384160 |
| C | 21.390076 | -15.811486 | -3.173964 |
| C | 22.460945 | -16.683942 | -3.395638 |
| C | 23.370581 | -17.463469 | -3.572883 |
| C | 24.434720 | -18.344203 | -3.797486 |
| C | 24.578496 | -19.627542 | -3.344637 |
| C | 25.640084 | -18.000617 | -4.613838 |
| C | 26.514657 | -21.289249 | -3.754800 |
| C | 27.661397 | -19.751370 | -5.035528 |
| C | 27.648122 | -21.112843 | -4.473566 |
| C | 16.092583 | -11.468520 | -2.228425 |
| C | 17.035947 | -12.209906 | -2.394275 |
| H | 0.110055  | -2.094049  | 0.671550  |
| H | -2.344581 | -0.430898  | 0.920855  |
| H | -4.778952 | 5.758487   | -0.470444 |
| H | -7.268294 | 7.381708   | -0.267023 |
| H | -9.705700 | 6.704177   | 0.720840  |
| H | 6.481176  | -1.945669  | -1.690782 |
| H | 8.890263  | -3.667257  | -1.982345 |

|   |           |            |           |
|---|-----------|------------|-----------|
| H | 11.138694 | -9.918683  | -0.547429 |
| H | 13.476999 | -11.720909 | -0.908871 |
| H | 19.627171 | -12.033813 | -3.784379 |
| H | 21.899325 | -13.909161 | -4.204889 |
| H | 23.922141 | -20.225206 | -2.730814 |
| H | 26.152201 | -22.142572 | -3.201261 |
| H | 28.438453 | -21.827780 | -4.633224 |
| O | 2.421007  | 1.265623   | -1.316028 |
| O | -0.353316 | 3.145697   | -1.032871 |
| O | -6.760517 | 2.146813   | 1.427803  |
| O | -9.576915 | 3.992702   | 1.652228  |
| O | 4.153668  | -5.224390  | 0.409104  |
| O | 6.877144  | -7.168749  | 0.082956  |
| O | 13.156908 | -6.529155  | -2.786993 |
| O | 15.799562 | -8.569118  | -3.199668 |
| O | 17.308850 | -15.080245 | -1.350724 |
| O | 19.877569 | -17.197437 | -1.822768 |
| O | 25.934338 | -16.994745 | -5.198496 |
| O | 28.457256 | -19.174651 | -5.726480 |
| N | -7.386015 | 4.336692   | 0.868424  |
| N | -6.735939 | 5.398201   | 0.287951  |
| N | -0.389856 | -0.093385  | 0.146355  |
| N | 0.262849  | 0.959151   | -0.449874 |
| N | 6.305157  | -4.967192  | -0.488061 |
| N | 6.962833  | -3.939595  | -1.121278 |
| N | 13.046931 | -9.712254  | -1.467420 |
| N | 13.706427 | -8.719168  | -2.151750 |
| N | 20.042405 | -14.028234 | -3.169162 |
| N | 19.385510 | -14.988394 | -2.437104 |
| N | 25.765350 | -20.136302 | -3.793533 |
| N | 26.420342 | -19.195519 | -4.549915 |

#### Heptamer

|   |           |           |           |
|---|-----------|-----------|-----------|
| C | -1.566220 | 0.441738  | 0.716833  |
| C | -1.841843 | 1.636441  | 0.108305  |
| C | -0.721576 | 1.951936  | -0.829337 |
| C | 1.408591  | 0.330746  | -1.146422 |
| C | 1.560465  | -0.953754 | -0.398872 |
| C | 0.468337  | -1.107561 | 0.413355  |
| C | -5.020664 | 4.028727  | 0.603251  |

|   |           |            |           |
|---|-----------|------------|-----------|
| C | -5.294329 | 5.222039   | -0.008287 |
| C | -6.142401 | 3.719196   | 1.543229  |
| C | -7.334093 | 6.778146   | 0.302480  |
| C | -8.273664 | 5.358188   | 1.858482  |
| C | -8.407179 | 6.621322   | 1.112656  |
| C | -2.955162 | 2.464267   | 0.287920  |
| C | -3.907394 | 3.200121   | 0.423218  |
| C | 4.714566  | -3.386171  | -0.845390 |
| C | 4.867651  | -4.671375  | -0.098047 |
| C | 5.806819  | -3.230239  | -1.656069 |
| C | 7.003054  | -6.287071  | -0.409039 |
| C | 7.846085  | -4.773771  | -1.953752 |
| C | 8.125052  | -5.967332  | -1.342756 |
| C | 9.243217  | -6.788808  | -1.517651 |
| C | 10.200598 | -7.519189  | -1.648430 |
| C | 11.319824 | -8.339195  | -1.823405 |
| C | 11.601073 | -9.532369  | -1.213011 |
| C | 12.441591 | -8.016496  | -2.756589 |
| C | 13.646490 | -11.068557 | -1.507118 |
| C | 14.583233 | -9.624296  | -3.063780 |
| C | 14.740484 | -10.907891 | -2.314799 |
| C | 2.656258  | -1.809968  | -0.547369 |
| C | 3.617589  | -2.531527  | -0.696708 |
| C | 17.914228 | -13.315970 | -2.753005 |
| C | 19.006372 | -13.150142 | -3.562396 |
| C | 18.077395 | -14.599970 | -2.006252 |
| C | 21.058141 | -14.676711 | -3.860661 |
| C | 20.226128 | -16.198020 | -2.317880 |
| C | 21.345835 | -15.868767 | -3.251461 |
| C | 22.470032 | -16.681593 | -3.428542 |
| C | 23.433624 | -17.402959 | -3.563669 |
| C | 24.560528 | -18.210792 | -3.746159 |
| C | 24.856593 | -19.404092 | -3.142161 |
| C | 25.674814 | -17.872714 | -4.682147 |
| C | 26.915075 | -20.920121 | -3.453845 |
| C | 27.829382 | -19.459065 | -5.007487 |
| C | 28.002336 | -20.745546 | -4.266688 |
| C | 29.111685 | -21.583224 | -4.423746 |
| C | 30.084053 | -22.287445 | -4.582153 |
| C | 31.195877 | -23.121888 | -4.743362 |



|   |           |            |           |
|---|-----------|------------|-----------|
| C | 31.379624 | -24.412684 | -4.010069 |
| C | 32.279348 | -22.937130 | -5.558607 |
| C | 33.555892 | -25.985623 | -4.351797 |
| C | 34.351639 | -24.448156 | -5.876145 |
| C | 34.644104 | -25.626645 | -5.277489 |
| C | 15.842788 | -11.756261 | -2.459449 |
| C | 16.810059 | -12.470370 | -2.606236 |
| H | 0.218687  | -1.902401  | 1.099207  |
| H | -2.131845 | -0.111616  | 1.450496  |
| H | -4.727516 | 5.771857   | -0.743949 |
| H | -7.076678 | 7.567785   | -0.387553 |
| H | -9.245395 | 7.289397   | 1.223626  |
| H | 6.056409  | -2.434644  | -2.341008 |
| H | 8.412240  | -4.218487  | -2.685595 |
| H | 11.036125 | -10.089183 | -0.481409 |
| H | 13.399011 | -11.864592 | -0.821904 |
| H | 19.249664 | -12.352014 | -4.246688 |
| H | 21.619947 | -14.116343 | -4.591951 |
| H | 24.300112 | -19.969897 | -2.410937 |
| H | 26.678449 | -21.722115 | -2.771790 |
| H | 32.508779 | -22.129589 | -6.236848 |
| H | 34.898037 | -23.869224 | -6.605686 |
| H | 35.520653 | -26.235465 | -5.426603 |
| O | 2.115115  | 0.862490   | -1.956490 |
| O | -0.542439 | 2.884519   | -1.561573 |
| O | -6.319276 | 2.786947   | 2.277960  |
| O | -8.978846 | 4.827591   | 2.673681  |
| O | 4.161254  | -5.203874  | 0.711233  |
| O | 6.825568  | -7.219319  | 0.323856  |
| O | 12.617537 | -7.083153  | -3.488424 |
| O | 15.289660 | -9.088718  | -3.871081 |
| O | 17.374537 | -15.139286 | -1.198301 |
| O | 20.055526 | -17.132648 | -1.586519 |
| O | 25.838376 | -16.934503 | -5.410993 |
| O | 28.526302 | -18.913021 | -5.816237 |
| O | 30.685613 | -24.963973 | -3.201014 |
| O | 33.397686 | -26.928074 | -3.623677 |
| N | -7.017394 | 4.835488   | 1.374990  |
| N | -6.487583 | 5.704365   | 0.452770  |
| N | -0.370473 | -0.039633  | 0.255781  |

|   |           |            |           |
|---|-----------|------------|-----------|
| N | 0.157869  | 0.834316   | -0.664122 |
| N | 6.119133  | -5.173620  | -0.579788 |
| N | 6.647449  | -4.298277  | -1.498486 |
| N | 12.800896 | -10.005441 | -1.668738 |
| N | 13.327423 | -9.128476  | -2.586940 |
| N | 19.855755 | -14.210216 | -3.404117 |
| N | 19.334115 | -15.090641 | -2.486460 |
| N | 26.058778 | -19.862464 | -3.604231 |
| N | 26.572674 | -18.976114 | -4.520435 |
| N | 32.633786 | -24.885115 | -4.504275 |
| N | 33.138559 | -23.991017 | -5.416341 |

#### Octamer

|   |           |            |           |
|---|-----------|------------|-----------|
| C | -1.757748 | 0.265985   | 0.360933  |
| C | -1.844501 | 1.621098   | 0.189168  |
| C | -0.509517 | 2.121057   | -0.259681 |
| C | 1.608543  | 0.491981   | -0.613948 |
| C | 1.538927  | -0.981417  | -0.377222 |
| C | 0.265640  | -1.290831  | 0.021692  |
| C | -5.001403 | 4.030439   | 0.738731  |
| C | -5.076575 | 5.386014   | 0.567144  |
| C | -6.341263 | 3.543312   | 1.191393  |
| C | -7.090836 | 6.962403   | 0.935698  |
| C | -8.443316 | 5.205936   | 1.572889  |
| C | -8.343847 | 6.658233   | 1.347882  |
| C | -2.953842 | 2.451034   | 0.383074  |
| C | -3.895815 | 3.195101   | 0.542945  |
| C | 4.684175  | -3.414538  | -0.878600 |
| C | 4.628321  | -4.888705  | -0.639070 |
| C | 5.954376  | -3.093695  | -1.276290 |
| C | 6.767005  | -6.496313  | -0.971830 |
| C | 7.996462  | -4.628951  | -1.594902 |
| C | 8.099636  | -5.982077  | -1.410565 |
| C | 9.224034  | -6.795297  | -1.584199 |
| C | 10.182875 | -7.521826  | -1.725231 |
| C | 11.310199 | -8.331123  | -1.898085 |
| C | 11.420496 | -9.683332  | -1.712707 |
| C | 12.640669 | -7.809884  | -2.335803 |
| C | 13.474059 | -11.205926 | -2.019982 |
| C | 14.790848 | -9.403836  | -2.656669 |

|   |           |            |           |
|---|-----------|------------|-----------|
| C | 14.744524 | -10.877170 | -2.411111 |
| C | 2.627086  | -1.842802  | -0.549817 |
| C | 3.589801  | -2.560825  | -0.707045 |
| C | 17.923613 | -13.272695 | -2.877941 |
| C | 19.194040 | -12.943833 | -3.269114 |
| C | 17.877408 | -14.746045 | -2.632444 |
| C | 21.247736 | -14.466217 | -3.576432 |
| C | 20.027704 | -16.339818 | -2.953507 |
| C | 21.358162 | -15.818422 | -3.391127 |
| C | 22.485551 | -16.627625 | -3.563975 |
| C | 23.444451 | -17.354078 | -3.705001 |
| C | 24.568934 | -18.167173 | -3.878678 |
| C | 24.672232 | -19.520296 | -3.694375 |
| C | 25.901509 | -17.652801 | -4.317389 |
| C | 26.714532 | -21.055315 | -4.012831 |
| C | 28.040395 | -19.260160 | -4.650032 |
| C | 27.984732 | -20.734307 | -4.410393 |
| C | 29.079247 | -21.587876 | -4.581788 |
| C | 30.042152 | -22.305713 | -4.738703 |
| C | 31.130514 | -23.166891 | -4.911045 |
| C | 31.061170 | -24.640286 | -4.674237 |
| C | 32.403813 | -22.857226 | -5.309738 |
| C | 33.179786 | -26.268852 | -5.027581 |
| C | 34.427743 | -24.413535 | -5.648027 |
| C | 34.514843 | -25.768577 | -5.475901 |
| C | 35.624513 | -26.598235 | -5.669097 |
| C | 36.566810 | -27.342049 | -5.828233 |
| C | 37.672742 | -28.177121 | -6.023216 |
| C | 37.748198 | -29.532628 | -5.851205 |
| C | 39.012710 | -27.689747 | -6.475273 |
| C | 39.762649 | -31.108761 | -6.219700 |
| C | 41.114965 | -29.352110 | -6.856733 |
| C | 41.015501 | -30.804498 | -6.632292 |
| C | 15.847573 | -11.721801 | -2.571067 |
| C | 16.820521 | -12.428133 | -2.717919 |
| H | -0.168659 | -2.243466  | 0.283149  |
| H | -2.506588 | -0.444319  | 0.675720  |
| H | -4.321258 | 6.089294   | 0.251450  |
| H | -6.640712 | 7.908787   | 0.675544  |
| H | -9.165250 | 7.339141   | 1.499225  |

|   |           |            |           |
|---|-----------|------------|-----------|
| H | 6.380249  | -2.137369  | -1.537987 |
| H | 8.739547  | -3.911315  | -1.906817 |
| H | 10.681311 | -10.404853 | -1.400530 |
| H | 13.053876 | -12.164227 | -1.756253 |
| H | 19.614154 | -11.985492 | -3.532812 |
| H | 21.986849 | -13.744585 | -3.888525 |
| H | 23.929201 | -20.237994 | -3.382473 |
| H | 26.288787 | -22.011691 | -3.751107 |
| H | 32.837961 | -21.904512 | -5.571157 |
| H | 35.176502 | -23.703054 | -5.962607 |
| H | 36.992877 | -30.236034 | -5.535799 |
| H | 39.312558 | -32.055232 | -5.959808 |
| H | 41.836810 | -31.485386 | -6.784233 |
| O | 2.514117  | 1.194003   | -0.967896 |
| O | -0.128322 | 3.226253   | -0.526481 |
| O | -6.727615 | 2.439616   | 1.461106  |
| O | -9.351755 | 4.509309   | 1.937336  |
| O | 3.729571  | -5.598053  | -0.283374 |
| O | 6.398053  | -7.603825  | -0.698024 |
| O | 13.003929 | -6.700388  | -2.609022 |
| O | 15.686755 | -8.689092  | -3.008928 |
| O | 16.981571 | -15.460875 | -2.280198 |
| O | 19.664558 | -17.449365 | -2.680363 |
| O | 26.270370 | -16.545243 | -4.591149 |
| O | 28.939086 | -18.550690 | -5.005638 |
| O | 30.155701 | -25.342482 | -4.320380 |
| O | 32.798837 | -27.374106 | -4.760666 |
| O | 39.398845 | -26.586054 | -6.745309 |
| O | 42.023229 | -28.655420 | -7.221493 |
| N | -7.117299 | 4.741634   | 1.239574  |
| N | -6.341080 | 5.811243   | 0.865756  |
| N | -0.488476 | -0.151215  | 0.062205  |
| N | 0.278551  | 0.926826   | -0.310442 |
| N | 5.962200  | -5.312175  | -0.942743 |
| N | 6.719520  | -4.227322  | -1.315669 |
| N | 12.700174 | -10.078421 | -1.991461 |
| N | 13.451612 | -8.989600  | -2.364778 |
| N | 19.968002 | -14.071276 | -3.297711 |
| N | 19.216660 | -15.160176 | -2.924457 |
| N | 25.949196 | -19.921808 | -3.973674 |

|   |           |            |           |
|---|-----------|------------|-----------|
| N | 26.706403 | -18.836872 | -4.346588 |
| N | 32.391287 | -25.074885 | -4.977612 |
| N | 33.158157 | -23.996689 | -5.350127 |
| N | 39.013089 | -29.957539 | -6.148630 |
| N | 39.789234 | -28.887810 | -6.522279 |

**C. Cartesian coordinates of acetylene-linked bimane oligomers optimized with MP2P/6-31G\*.**

Dimer

|   |           |           |           |
|---|-----------|-----------|-----------|
| C | -1.656962 | 0.316317  | 0.561676  |
| C | -1.847710 | 1.587177  | 0.086446  |
| C | -0.577184 | 2.051929  | -0.529298 |
| C | 1.472821  | 0.439238  | -0.959700 |
| C | 1.445465  | -0.984372 | -0.598222 |
| C | 0.333418  | -1.234049 | 0.139430  |
| C | -5.178389 | 3.863260  | 0.243382  |
| C | -5.369102 | 5.134108  | -0.231929 |
| C | -6.448965 | 3.398499  | 0.859016  |
| C | -7.360013 | 6.684322  | 0.189194  |
| C | -8.499378 | 5.011207  | 1.288661  |
| C | -8.472354 | 6.434627  | 0.926416  |
| C | -3.001485 | 2.383686  | 0.174054  |
| C | -4.024632 | 3.066730  | 0.155790  |
| H | -0.035721 | -2.150661 | 0.582448  |
| H | -2.342224 | -0.349095 | 1.072893  |
| H | -4.683811 | 5.799506  | -0.743123 |
| H | -6.990955 | 7.600831  | -0.254104 |
| H | -9.229504 | 7.145187  | 1.225569  |
| H | 2.202192  | -1.695052 | -0.898164 |
| O | 2.238335  | 1.093102  | -1.645310 |
| O | -0.300418 | 3.085567  | -1.109614 |
| O | -6.725821 | 2.364803  | 1.439192  |
| O | -9.265076 | 4.357407  | 1.974132  |
| N | -7.349376 | 4.479072  | 0.601998  |
| N | -6.683376 | 5.499734  | -0.043041 |
| N | 0.323339  | 0.971448  | -0.272190 |
| N | -0.342648 | -0.049314 | 0.372793  |

Trimer

|   |           |           |           |
|---|-----------|-----------|-----------|
| C | -1.808866 | 0.160693  | 0.204887  |
| C | -1.944160 | 1.479216  | -0.151606 |
| C | -0.723280 | 1.895157  | -0.889257 |
| C | 1.417418  | 0.336550  | -1.123566 |
| C | 1.491892  | -1.022539 | -0.527738 |
| C | 0.257256  | -1.343661 | -0.021329 |
| C | -5.049833 | 3.964429  | 0.530119  |
| C | -5.186757 | 5.281640  | 0.177175  |
| C | -6.277717 | 3.543969  | 1.254979  |
| C | -7.291478 | 6.730911  | 0.306657  |
| C | -8.446783 | 5.052206  | 1.381332  |
| C | -8.525207 | 6.375477  | 0.747711  |
| C | -3.042181 | 2.327284  | 0.059948  |
| C | -3.950618 | 3.117098  | 0.316184  |
| C | 4.857696  | -3.248945 | -0.554367 |
| C | 4.928266  | -4.614720 | 0.028372  |
| C | 6.092055  | -2.930060 | -1.057402 |
| C | 7.014774  | -6.204506 | -0.310837 |
| C | 8.104187  | -4.477831 | -1.378315 |
| C | 8.197709  | -5.799433 | -1.082363 |
| C | 2.648791  | -1.816243 | -0.563006 |
| C | 3.700755  | -2.453704 | -0.521323 |
| H | -0.082272 | -2.240203 | 0.482897  |
| H | -2.483042 | -0.492179 | 0.745772  |
| H | -4.508104 | 5.937316  | -0.355009 |
| H | -6.948163 | 7.619898  | -0.207648 |
| H | -9.439590 | 6.943801  | 0.655001  |
| H | 6.434072  | -2.029301 | -1.552737 |
| H | 8.768655  | -3.822629 | -1.927735 |
| H | 8.992898  | -6.475577 | -1.361976 |
| O | 2.266280  | 1.032252  | -1.648797 |
| O | -0.392997 | 2.968388  | -1.357790 |
| O | -6.609848 | 2.463507  | 1.706351  |
| O | -9.297177 | 4.326521  | 1.864436  |
| O | 4.070762  | -5.312662 | 0.537306  |
| O | 6.650757  | -7.284236 | 0.119112  |
| N | -7.037681 | 4.752430  | 1.334236  |
| N | -6.370916 | 5.768324  | 0.682864  |
| N | -0.620739 | -0.321240 | -0.289086 |
| N | 0.038870  | 0.684947  | -0.955821 |
| N | 6.306318  | -4.962838 | -0.126471 |

N 6.975070 -3.948408 -0.778056

Tetramer

C -0.098607 -0.437718 -1.162919  
C -0.112502 0.899049 -0.852039  
C 1.290714 1.385872 -0.802625  
C 3.386629 -0.240321 -0.994580  
C 3.250917 -1.710747 -1.160491  
C 1.923485 -2.006910 -1.348222  
C -3.292135 3.297317 -0.201285  
C -3.310031 4.631850 0.110488  
C -4.695940 2.812432 -0.264707  
C -5.329079 6.202580 0.172903  
C -6.774364 4.447336 -0.198992  
C -6.627927 5.904966 -0.086556  
C -1.223970 1.734091 -0.660499  
C -2.177934 2.464641 -0.394020  
C 6.407289 -4.222036 -1.091561  
C 6.271589 -5.692468 -1.257417  
C 7.734719 -3.925851 -0.903839  
C 8.367559 -7.318599 -1.449485  
C 9.756850 -5.495008 -1.089080  
C 9.770780 -6.831773 -1.399949  
C 10.882226 -7.666852 -1.591438  
C 11.836084 -8.397568 -1.857839  
C 12.950137 -9.230417 -2.050662  
C 12.967802 -10.564991 -2.362274  
C 14.354021 -8.745715 -1.987526  
C 14.986634 -12.136001 -2.424897  
C 16.432206 -10.380921 -2.053355  
C 16.285578 -11.838535 -2.165746  
C 4.345975 -2.587676 -1.171840  
C 5.312222 -3.345118 -1.080218  
H 1.432767 -2.959737 -1.505121  
H -0.916216 -1.136657 -1.290471  
H -2.492331 5.329337 0.246834  
H -4.832003 7.153593 0.318359  
H -7.444817 6.601860 -0.207861  
H 8.225422 -2.973015 -0.746947  
H 10.574434 -4.796043 -0.961502

|   |           |            |           |
|---|-----------|------------|-----------|
| H | 12.149989 | -11.262390 | -2.498397 |
| H | 14.489413 | -13.086961 | -2.570206 |
| H | 17.102415 | -12.535522 | -2.044615 |
| O | 4.358231  | 0.458002   | -0.774327 |
| O | 1.754024  | 2.478607   | -0.535550 |
| O | -5.153225 | 1.720906   | -0.549196 |
| O | -7.728792 | 3.740969   | -0.469536 |
| O | 5.300012  | -6.390801  | -1.477743 |
| O | 7.904294  | -8.411372  | -1.716479 |
| O | 14.811497 | -7.654218  | -1.703228 |
| O | 17.386808 | -9.674651  | -1.783175 |
| N | -4.608833 | 5.031106   | 0.329702  |
| N | -5.454058 | 3.962874   | 0.117109  |
| N | 1.199338  | -0.840257  | -1.367024 |
| N | 2.045142  | 0.226719   | -1.173218 |
| N | 7.613104  | -6.159475  | -1.078883 |
| N | 8.458885  | -5.092488  | -0.885059 |
| N | 14.266515 | -10.964447 | -2.581658 |
| N | 15.111918 | -9.896308  | -2.369304 |

#### Hexamer

|   |            |           |          |
|---|------------|-----------|----------|
| C | -11.511860 | 7.344061  | 1.866382 |
| C | -11.612166 | 8.637137  | 1.422560 |
| C | -10.417677 | 8.944451  | 0.594955 |
| C | -8.365732  | 7.271813  | 0.353639 |
| C | -8.320922  | 5.952097  | 1.032832 |
| C | -9.534208  | 5.729951  | 1.631667 |
| C | -14.572058 | 11.290014 | 2.090674 |
| C | -14.671603 | 12.577257 | 1.634302 |
| C | -15.767792 | 10.994269 | 2.920977 |
| C | -16.683844 | 14.150607 | 1.787383 |
| C | -17.841906 | 12.631522 | 3.072335 |
| C | -17.895559 | 13.906092 | 2.345622 |
| C | -12.659849 | 9.543282  | 1.635526 |
| C | -13.526426 | 10.379859 | 1.878481 |
| C | -5.076696  | 3.565900  | 0.937061 |
| C | -5.007343  | 2.231367  | 1.585240 |
| C | -3.869128  | 3.823384  | 0.341075 |
| C | -2.918414  | 0.604088  | 1.309743 |
| C | -1.856785  | 2.256188  | 0.076231 |



|   |            |            |           |
|---|------------|------------|-----------|
| C | -1.727009  | 0.957218   | 0.496543  |
| C | -0.651258  | 0.088504   | 0.270937  |
| C | 0.248726   | -0.704877  | 0.003693  |
| C | 1.340648   | -1.547994  | -0.240103 |
| C | 1.517950   | -2.846068  | 0.164742  |
| C | 2.507799   | -1.149691  | -1.067884 |
| C | 3.583150   | -4.335865  | -0.129421 |
| C | 4.649833   | -2.692865  | -1.369851 |
| C | 4.776940   | -4.026234  | -0.727974 |
| C | -7.211716  | 5.097873   | 0.986489  |
| C | -6.196287  | 4.405524   | 0.999723  |
| C | 8.167980   | -6.194016  | -0.907295 |
| C | 9.349570   | -5.835305  | -1.503261 |
| C | 8.336836   | -7.537036  | -0.296964 |
| C | 11.460431  | -7.251034  | -1.834787 |
| C | 10.526833  | -9.007889  | -0.644460 |
| C | 11.680744  | -8.551316  | -1.460570 |
| C | 12.807176  | -9.341795  | -1.726607 |
| C | 13.751492  | -10.069594 | -2.024376 |
| C | 14.886141  | -10.846478 | -2.300048 |
| C | 15.129678  | -12.144518 | -1.937664 |
| C | 16.034960  | -10.363393 | -3.108675 |
| C | 17.299690  | -13.474841 | -2.209773 |
| C | 18.273809  | -11.748779 | -3.380707 |
| C | 18.472246  | -13.059813 | -2.750713 |
| C | 5.935754   | -4.809651  | -0.804232 |
| C | 6.993787   | -5.435030  | -0.815706 |
| H | -9.882908  | 4.885845   | 2.213034  |
| H | -12.182871 | 6.762825   | 2.486161  |
| H | -13.999314 | 13.149689  | 1.007290  |
| H | -16.331300 | 14.976623  | 1.182880  |
| H | -18.780572 | 14.521728  | 2.277310  |
| H | -3.537097  | 4.687584   | -0.220064 |
| H | -1.196666  | 2.865340   | -0.528414 |
| H | 0.888173   | -3.482633  | 0.773434  |
| H | 3.287977   | -5.215486  | 0.428405  |
| H | 9.613941   | -4.934737  | -2.042790 |
| H | 12.070024  | -6.580059  | -2.426873 |
| H | 14.531652  | -12.830301 | -1.350308 |
| H | 17.044920  | -14.376507 | -1.667460 |
| H | 19.418881  | -13.579837 | -2.732190 |

O -7.520916 7.884751 -0.269554  
O -10.070392 9.962787 0.029320  
O -16.120763 9.975226 3.483275  
O -18.689166 11.999774 3.675515  
O -5.838674 1.589779 2.197237  
O -3.243195 -0.433240 1.853752  
O 2.790591 -0.097260 -1.606265  
O 5.452902 -2.013550 -1.978802  
O 7.557804 -8.252852 0.301671  
O 10.277814 -10.082134 -0.133148  
O 16.268616 -9.274665 -3.597865  
O 19.041827 -10.986097 -3.936811  
N -16.464280 12.240173 2.937208  
N -15.796731 13.160631 2.162690  
N -10.372101 6.778382 1.353725  
N -9.708320 7.703343 0.585784  
N -3.659102 1.826653 1.335090  
N -3.014051 2.781220 0.588631  
N 2.682683 -3.330445 -0.372891  
N 3.285706 -2.347465 -1.118885  
N 9.709312 -7.837106 -0.564674  
N 10.279028 -6.818693 -1.288587  
N 16.307126 -12.561766 -2.508025  
N 16.863181 -11.520901 -3.215034

#### Octamer

C -18.137901 12.312952 2.940990  
C -18.214085 13.670216 2.751873  
C -16.893159 14.154468 2.275453  
C -14.785691 12.534757 1.939189  
C -14.839066 11.076203 2.213531  
C -16.111449 10.755150 2.617784  
C -21.317207 16.141262 3.463470  
C -21.384849 17.501436 3.307000  
C -22.623811 15.664182 3.984954  
C -23.423593 19.041401 3.615331  
C -24.730137 17.270575 4.299103  
C -24.690478 18.699027 3.963104  
C -19.293478 14.523335 3.015159  
C -20.243443 15.286587 3.176938

|   |            |            |           |
|---|------------|------------|-----------|
| C | -11.618735 | 8.684409   | 1.840550  |
| C | -11.658481 | 7.222750   | 2.102843  |
| C | -10.351193 | 9.019958   | 1.433721  |
| C | -9.529476  | 5.627587   | 1.768898  |
| C | -8.305389  | 7.487133   | 1.112665  |
| C | -8.210981  | 6.131017   | 1.305883  |
| C | -7.113945  | 5.295849   | 1.060237  |
| C | -6.142121  | 4.553328   | 0.931190  |
| C | -5.043875  | 3.719861   | 0.685276  |
| C | -4.947122  | 2.363697   | 0.876062  |
| C | -3.726167  | 4.226226   | 0.223003  |
| C | -2.894675  | 0.837850   | 0.567088  |
| C | -1.590645  | 2.638737   | -0.098164 |
| C | -1.625041  | 1.178283   | 0.170753  |
| C | -13.721007 | 10.238149  | 2.117371  |
| C | -12.742432 | 9.514077   | 1.942622  |
| C | 1.621484   | -1.181876  | -0.175668 |
| C | 2.890902   | -0.840916  | -0.572247 |
| C | 1.587703   | -2.642367  | 0.093121  |
| C | 4.944070   | -2.365834  | -0.881196 |
| C | 3.723992   | -4.228899  | -0.228004 |
| C | 5.041522   | -3.721904  | -0.690144 |
| C | 6.140082   | -4.555015  | -0.935890 |
| C | 7.112211   | -5.297159  | -1.064816 |
| C | 8.209276   | -6.132290  | -1.310495 |
| C | 8.303412   | -7.488520  | -1.117921 |
| C | 9.527930   | -5.628871  | -1.773039 |
| C | 10.349303  | -9.021326  | -1.438193 |
| C | 11.656993  | -7.224030  | -2.106241 |
| C | 11.617195  | -8.685658  | -1.843859 |
| C | 12.741004  | -9.515307  | -1.944769 |
| C | 13.720092  | -10.238950 | -2.118404 |
| C | 14.838508  | -11.076672 | -2.213304 |
| C | 14.785818  | -12.535020 | -1.937752 |
| C | 16.110969  | -10.755202 | -2.616991 |
| C | 16.894498  | -14.153760 | -2.271184 |
| C | 18.138593  | -12.312061 | -2.937449 |
| C | 18.215483  | -13.669110 | -2.747045 |
| C | 19.295688  | -14.521596 | -3.009066 |
| C | 20.246305  | -15.284299 | -3.169665 |
| C | 21.320932  | -16.138055 | -3.455714 |

C 21.389622 -17.498184 -3.299034  
C 22.627315 -15.659935 -3.976854  
C 23.429131 -19.037252 -3.609587  
C 24.734435 -17.265484 -4.293490  
C 24.695450 -18.694316 -3.958987  
C -0.495430 0.355319 0.080527  
C 0.491668 -0.359207 -0.085303  
H -16.535929 9.802792 2.909364  
H -18.885615 11.609625 3.285081  
H -20.641202 18.202700 2.949435  
H -22.999986 19.988721 3.307543  
H -25.554360 19.346710 3.994324  
H -9.936181 9.978561 1.149114  
H -7.564575 8.201562 0.776575  
H -5.686630 1.647394 1.210979  
H -3.307424 -0.121570 0.852239  
H 3.303200 0.118695 -0.857410  
H 5.683288 -1.649214 -1.216080  
H 7.562392 -8.202981 -0.782343  
H 9.934131 -9.979947 -1.153898  
H 16.535086 -9.802822 -2.909032  
H 18.886081 -11.608506 -3.281563  
H 20.646532 -18.200090 -2.941598  
H 23.006078 -19.984949 -3.302205  
H 25.559325 -19.341905 -3.992414  
O -13.872145 13.252297 1.580012  
O -16.497922 15.270637 1.999656  
O -23.026720 14.542451 4.228350  
O -25.641741 16.532683 4.624728  
O -12.562865 6.495402 2.464692  
O -9.908821 4.506948 2.048735  
O -3.347827 5.348325 -0.052056  
O -0.686077 3.369774 -0.452181  
O 0.683511 -3.373746 0.447386  
O 3.346270 -5.351135 0.047349  
O 9.907596 -4.508143 -2.052064  
O 12.561713 -6.496584 -2.467056  
O 13.872418 -13.252713 -1.578505  
O 16.499849 -15.269903 -1.994458  
O 23.029062 -14.537926 -4.220896  
O 25.645452 -16.527299 -4.620119

N -22.600878 17.944960 3.759107  
 N -23.353852 16.874871 4.171995  
 N -16.127485 12.951858 2.192133  
 N -16.884422 11.883890 2.593957  
 N -9.570456 7.895805 1.436156  
 N -10.316625 6.817491 1.829616  
 N -2.938517 3.037010 0.154231  
 N -3.682397 1.956804 0.547283  
 N 3.679014 -1.959593 -0.552889  
 N 2.935623 -3.040129 -0.159831  
 N 10.314719 -6.818988 -1.834793  
 N 9.568341 -7.897338 -1.441821  
 N 16.884577 -11.883468 -2.591789  
 N 16.128010 -12.951546 -2.189587  
 N 23.358397 -16.870061 -4.163210  
 N 22.606276 -17.940613 -3.750314

**D. Vertical excitation energies ( $S_0 \rightarrow S_1$ ) for bimane oligomers in A and B evaluated with various exchange correlation functionals within TD-DFT.**

Table S1 Vertical excitation energies (eV) for  $S_0 \rightarrow S_1$  in bimane oligomers ( $n=2-8$ ) calculated at various levels of theory using the 6-311+G\* basis set. All molecular structures were optimized in the electronic ground state using B3LYP/6-31G\*.

| $n$ | B3LYP | LC-BLYP | $\omega$ B97X | CAM-B3LYP |
|-----|-------|---------|---------------|-----------|
| 2   | 2.74  | 3.50    | 3.36          | 3.17      |
| 3   | 2.45  | 3.18    | 3.04          | 2.82      |
| 4   | 2.43  | 3.04    | 2.90          | 2.67      |
| 5   | 2.41  | 2.97    | 2.82          | 2.59      |
| 6   | 2.40  | 2.92    | 2.77          | 2.54      |
| 7   | 2.40  | 2.89    | 2.74          | 2.50      |
| 8   | 2.39  | 2.87    | 2.72          | 2.48      |

Table S2 Vertical excitation energies (eV) for  $S_0 \rightarrow S_1$  in bimane oligomers ( $n=2-8$ ) calculated at various levels of theory using the 6-31+G\* basis set. All molecular structures were optimized in the electronic ground state using B3LYP/6-311G\*.

| $n$ | B3LYP | LC-BLYP | $\omega$ B97X | CAM-B3LYP |
|-----|-------|---------|---------------|-----------|
| 2   | 2.76  | 3.51    | 3.38          | 3.19      |
| 3   | 2.45  | 3.20    | 3.06          | 2.84      |
| 4   | 2.43  | 3.06    | 2.91          | 2.69      |
| 5   | 2.42  | 2.98    | 2.84          | 2.60      |

---

|   |      |      |      |      |
|---|------|------|------|------|
| 6 | 2.41 | 2.93 | 2.78 | 2.55 |
| 7 | 2.40 | 2.91 | 2.75 | 2.52 |
| 8 | 2.40 | 2.88 | 2.74 | 2.49 |

---
